# Supplementary material
Source: HighWire-hosted journal article supplement (doi:10.1101/rna.079912.123)
Supplement: Supplemental_Excel_sheet_S1.xlsx [file Supplemental_Excel_sheet_S1.xlsx]

## Sheet: 1_filtered proteins
All proteins filtered for "FDR confidence: combined ("high" equals <1%)" and "found in sample ("high" equals quantification and identification)" and "abundance count: replicate 1 ("3")"
Protein FDR Confidence: Combined	Accession	# Unique Peptides	Gene Symbol	Exp. q-value: Combined	Sum PEP Score	Coverage [%]	# Peptides	# PSMs	# AAs	MW [kDa]	calc. pI	Score Sequest HT: Sequest HT	# Peptides (by Search Engine): Sequest HT	Pfam IDs	Entrez Gene ID	Ensembl Gene ID	Gene ID	Abundance: replicate 1 (LiCl treatment)	Abundance: replicate 2 (LiCl treatment)	Abundances Count: replicate 1 (LiCl treatment)	Abundances Count: replicate 2 (LiCl treatment)	Found in Sample: replicate 1 (LiCl treatment)	Found in Sample: replicate 2 (LiCl treatment)	# Protein Groups	Modifications
High	P40212	9	RPL13B	0	101.284	52	9	190	199	22.5	11.08	274.72	9	Pf01294	855173	YMR142C	D6VZW4; P40212; sce:YMR142C	1.2719e+07	4.33066e+06	3	3	High	High	1
High	P40525	4	RPL34B	0	39.059	32	4	106	121	13.6	10.83	149.83	4	Pf01199	854759	YIL052C	D6VVM9; P40525; sce:YIL052C	1.03727e+07	4.99078e+06	3	3	High	High	1
High	P39744	41	NOC2	0	389.2	59	41	824	710	81.6	8.48	994.31	41	Pf03715	854381	YOR206W	D6W2R2; P39744; Q08625; sce:YOR206W	9.73059e+06	4.98472e+06	3	3	High	High	1
High	Q12159	10	YRA1	0	80.432	42	10	157	226	24.9	11.33	177.39	10	Pf00076	851988	YDR381W	D6VT14; Q12159; sce:YDR381W	9.21877e+06	5.00311e+06	3	3	High	High	1
High	P43586	10	LOC1	0	99.53	35	10	181	204	23.6	10.32	259.8	10		850551	YFR001W	D6VTN1; P43586; sce:YFR001W	8.6569e+06	2.13493e+06	3	3	High	High	1
High	P0CX85	8	RPL35B	0	72.045	46	8	89	120	13.9	10.58	122.23	8	Pf00831	851336; 851419	YDL136W; YDL191W	D6VRG2; P0CX85; P39741; P39930; sce:YDL136W; sce:YDL191W	8212914	2.99182e+06	3	3	High	High	1
High	P02293	6	HTB1	0	59.261	40	6	70	131	14.2	10.1	74.85	6	Pf00125	851810	YDR224C	D6VSK6; P02293; sce:YDR224C	8.16582e+06	5.13089e+06	3	3	High	High	1
High	P04456	8	RPL25	0	123.409	52	8	235	142	15.7	10.11	364.67	8	Pf00276, Pf03939	853993	YOL127W	D6W1U1; P04456; sce:YOL127W	8.12396e+06	3.4214e+06	3	3	High	High	1
High	P0CX53	9	RPL12A	0	119.521	63	9	145	165	17.8	9.41	305.54	9	Pf00298, Pf03946	852026; 856656	YDR418W; YEL054C	D3DLJ6; P05741; P0CX53; P17079; sce:YDR418W; sce:YEL054C	8090119	3.72327e+06	3	3	High	High	1
High	P0CX43	12	RPL1A	0	124.126	54	12	235	217	24.5	9.72	362.62	12	Pf00687	852742; 855881	YGL135W; YPL220W	D6VU14; P0CX43; P53030; sce:YGL135W; sce:YPL220W	8.02149e+06	4.19177e+06	3	3	High	High	1
High	P38061	8	RPL32	0	57.056	51	8	131	130	14.8	11.17	139.44	8	Pf01655	852185	YBL092W	A2TBM1; D6VPR1; P38061; sce:YBL092W	7.19694e+06	2.34227e+06	3	3	High	High	1	Met-loss+Acetyl [N-Term]
High	Q3E757	10	RPL11B	0	83.214	61	10	150	174	19.7	9.92	246.75	10	Pf00281, Pf00673	852976	YGR085C	D6VUL7; P06380; Q3E757; sce:YGR085C	7.05399e+06	3.27628e+06	3	3	High	High	1
High	P26321	13	RPL5	0	243.745	68	14	264	297	33.7	6.83	426.8	14	Pf14204, Pf17144	855972	YPL131W	D6W3N6; P26321; sce:YPL131W	6.60222e+06	2.52918e+06	3	3	High	High	1
High	P0CX49	14	RPL18A	0	88.888	54	14	258	186	20.6	11.71	366.42	14	Pf17135	854029; 855415	YNL301C; YOL120C	D6W0P3; P07279; P0CX49; sce:YNL301C; sce:YOL120C	6.14064e+06	2.17491e+06	3	3	High	High	1
High	P0CX48	8	RPS11B	0	54.706	54	8	44	156	17.7	10.78	50.68	8	Pf00366, Pf16205	851589; 852337	YBR048W; YDR025W	D6VQ48; O11852; P0CX48; P26781; sce:YBR048W; sce:YDR025W	6.1187e+06	2.6523e+06	3	3	High	High	1	Met-loss+Acetyl [N-Term]
High	P07280	7	RPS19A	0	53.684	57	7	56	144	15.9	9.61	83.19	7	Pf01090	854028	YOL121C	D6W1U7; P07280; sce:YOL121C	5.672e+06	3.29358e+06	3	3	High	High	1
High	P02309	4	HHF1; HHF2	0	29.097	39	4	52	103	11.4	11.36	74.92	4	Pf15511	852294; 855701	YBR009C; YNL030W	D6VQ10; P02309; sce:YBR009C; sce:YNL030W	5.3974e+06	4.45451e+06	3	3	High	High	1
High	Q12176	47	MAK21	0	583.362	60	47	603	1025	116.6	5.02	960.67	47	Pf03914	851632	YDR060W	D6VS46; Q12176; sce:YDR060W	5.34933e+06	2.60086e+06	3	3	High	High	1	Met-loss+Acetyl [N-Term]
High	Q08746	8	RRS1	0	157.506	59	8	146	203	22.9	9.47	243.01	8	Pf04939	854469	YOR294W	D6W2Z3; Q08746; sce:YOR294W	5.2396e+06	2.27364e+06	3	3	High	High	1
High	P36049	24	EBP2	0	265.312	51	24	301	427	49.7	6.42	544.5	24	Pf05890	853682	YKL172W	D6VX28; P36049; sce:YKL172W	5.02591e+06	1.51589e+06	3	3	High	High	1
High	Q07896	32	NOC3	0	500.421	61	33	568	663	75.5	5.95	880	33	Pf03914, Pf07540	850688	YLR002C	D6VY04; Q07896; Q92280; sce:YLR002C	4.99929e+06	2.65485e+06	3	3	High	High	1
High	P40991	35	NOP2	0	495.214	64	35	502	618	69.8	5.05	818.01	35	Pf01189, Pf17125	855664	YNL061W	D6W1B9; E9P914; P40991; sce:YNL061W	4.89219e+06	1.35989e+06	3	3	High	High	1
High	P0CX83	6	RPL19B	0	73.304	33	6	115	189	21.7	11.36	166.38	6	Pf01280	852254; 852379	YBL027W; YBR084C-A	D6VPX3; P05735; P0CX83; sce:YBL027W; sce:YBR084C-A	4.81246e+06	1.55886e+06	3	3	High	High	1
High	P0C2H6	7	RPL27A	0	86.576	54	7	158	136	15.5	10.36	224.69	7	Pf01777	856401	YHR010W	D3DKV5; P0C2H6; P38706; sce:YHR010W	4.74179e+06	1.88613e+06	3	3	High	High	1
High	P02994	16	TEF1; TEF2	0	185.685	46	16	150	458	50	9.04	224.71	16	Pf00009, Pf03143, Pf03144	852415; 856195	YBR118W; YPR080W	D6VQB6; P02994; Q7Z7U8; Q7Z8Q8; Q7Z8Q9; sce:YBR118W; sce:YPR080W	4629112	2339982	3	3	High	High	1
High	P14126	25	RPL3	0	340.968	65	25	713	387	43.7	10.29	1137.32	25	Pf00297	854229	YOR063W	D6W2C6; P14126; Q08459; sce:YOR063W	4.49662e+06	1.31713e+06	3	3	High	High	1
High	P33201	14	MRT4	0	171.57	68	14	229	236	27	8.56	380.74	14	Pf00466, Pf17777	853860	YKL009W	D6VXS7; P33201; sce:YKL009W	4.43396e+06	1.41151e+06	3	3	High	High	1
High	P32445	6	RIM1	0	71.003	67	7	71	135	15.4	8.34	103.29	7	Pf00436	850395	YCR028C-A	D6VR39; O11851; P32445; sce:YCR028C-A	4.29494e+06	1.76775e+06	3	3	High	High	1
High	P0CX24	11	RPL20B	0	104.02	55	11	145	172	20.4	10.3	191.69	11	Pf01775	854489; 855283		A1YV95; A1YV96; D6W068; P0C2I0; P0C2I1; P0CX24; P47913; sce:YMR242C; sce:YOR312C	4.16162e+06	1.38752e+06	3	3	High	High	1
High	P48589	5	RPS12	0	39.91	50	5	40	143	15.5	4.73	56.74	5	Pf01248	854551	YOR369C	D6W362; P48589; Q02545; sce:YOR369C	4.08306e+06	1.44013e+06	3	3	High	High	1	Met-loss+Acetyl [N-Term]
High	Q3E7Y3	9	RPS22B	0	95.206	74	9	110	130	14.6	9.94	199.7	9	Pf00410	851082	YLR367W	D6VZ04; P04648; Q3E7Y3; sce:YLR367W	3.97588e+06	1.88908e+06	3	3	High	High	1
High	Q08235	16	BRX1	0	263.77	68	16	250	291	33.5	9.29	394.49	16	Pf04427	854078	YOL077C	D6W1Z1; Q08235; sce:YOL077C	3.90702e+06	1.42697e+06	3	3	High	High	1
High	P0CX46	8	RPL2B	0	71.622	33	8	83	254	27.4	11.11	129.11	8	Pf00181, Pf03947	850590; 854794	YFR031C-A; YIL018W	D6VTR2; P05736; P0CX46; sce:YFR031C-A; sce:YIL018W	3.89573e+06	1.44622e+06	3	3	High	High	1
High	P0CX40	7	RPS8B	0	69.656	49	7	49	200	22.5	10.67	70.12	7	Pf01201	852206; 856839	YBL072C; YER102W	A2TBM0; A2TBP0; D3DM09; P05754; P0CX40; P22801; sce:YBL072C; sce:YER102W	3.71581e+06	1.67258e+06	3	3	High	High	1
High	P36160	15	RPF2	0	281.007	48	15	429	344	39.6	9	654.55	15	Pf04427	853956	YKR081C	D6VXE1; P36160; sce:YKR081C	3.70574e+06	1.23418e+06	3	3	High	High	1
High	P09624	27	LPD1	0	204.899	66	27	139	499	54	8.03	155.94	27	Pf02852, Pf07992	850527	YFL018C	D6VTL1; P09624; sce:YFL018C	3.47572e+06	1.16288e+06	3	3	High	High	1
High	Q12522	9	TIF6	0	180.725	68	9	84	245	26.4	4.64	154.66	9	Pf01912	856126	YPR016C	D6W426; Q12522; sce:YPR016C	3.45364e+06	757356	3	3	High	High	1
High	Q08962	12	NIP7	0	135.377	80	12	146	181	20.4	9.26	194.1	12	Pf03657, Pf17833	855890	YPL211W	D6W3F9; Q08962; sce:YPL211W	3.36602e+06	1.01715e+06	3	3	High	High	1
High	P05319	5	RPP2A	0	51.989	79	5	40	106	10.7	4.04	53.36	5	Pf00428	854118	YOL039W	D6W227; P05319; sce:YOL039W	3.30861e+06	1.409e+06	3	3	High	High	1
High	P0CX38	11	RPS6B	0	101.889	44	11	77	236	27	10.45	118.9	11	Pf01092	852479; 856015	YBR181C; YPL090C	D6VQH5; P02365; P05751; P0CX38; Q02894; sce:YBR181C; sce:YPL090C	3.27749e+06	1.35888e+06	3	3	High	High	1
High	P0CX30	4	RPS23B	0	63.575	39	4	33	145	16	10.73	44.72	4	Pf00164	853015; 856250	YGR118W; YPR132W	D6VUP9; P0CX30; P32827; sce:YGR118W; sce:YPR132W	3.24421e+06	1.54323e+06	3	3	High	High	1
High	P26786	6	RPS7A	0	74.263	67	11	111	190	21.6	9.83	112.78	11	Pf01251	854263	YOR096W	D6W2F7; P26786; Q08502; sce:YOR096W	3.12657e+06	1.68897e+06	3	3	High	High	1
High	Q07915	5	RLP24	0	55.947	30	5	82	199	24	9.57	133.27	5	Pf01246	850695	YLR009W	D6VY11; Q07915; sce:YLR009W	3.12467e+06	622501	3	3	High	High	1
High	P53163	5	MNP1	0	29.453	23	5	36	194	20.6	9.19	46.1	5	Pf00542, Pf16320	852811	YGL068W	D6VU73; P53163; sce:YGL068W	3.11115e+06	1.03476e+06	3	3	High	High	1
High	Q08208	30	NOP12	0	290.801	65	30	264	459	51.9	9.44	427.18	30	Pf00076	854116	YOL041C	D6W225; Q08208; sce:YOL041C	2.99227e+06	1.05783e+06	3	3	High	High	1	Met-loss+Acetyl [N-Term]
High	P38112	33	MAK5	0	326.513	56	33	168	773	87	8.4	255.54	33	Pf00270, Pf00271	852439	YBR142W	D6VQD8; P38112; sce:YBR142W	2.94824e+06	980173	3	3	High	High	1
High	P0CX31	7	RPS24A	0	48.237	47	7	74	135	15.3	10.51	106.08	7	Pf01282	854741; 856805	YER074W; YIL069C	D3DLX9; P0CX31; P26782; sce:YER074W; sce:YIL069C	2.94151e+06	1.21627e+06	3	3	High	High	1	Met-loss+Acetyl [N-Term]
High	P05739	4	RPL6B	0	104.422	66	14	195	176	20	10.08	277.58	14	Pf01159	851169	YLR448W	D6VZ82; P05739; sce:YLR448W	2.90861e+06	1.22366e+06	3	3	High	High	1
High	P02406	8	RPL28	0	68.938	43	8	85	149	16.7	10.62	106.61	8	Pf00828	852775	YGL103W	D6VU43; P02406; sce:YGL103W	2.82656e+06	958035	3	3	High	High	1
High	P10080	12	SBP1	0	133.431	62	12	88	294	33	5.66	124.64	12	Pf00076	856351	YHL034C	D3DKT4; P10080; sce:YHL034C	2.69329e+06	1.38571e+06	3	3	High	High	1	Met-loss+Acetyl [N-Term]
High	P02400	7	RPP2B	0	78.728	82	7	47	110	11	4.15	66.45	7	Pf00428	851990	YDR382W	D6VT16; P02400; sce:YDR382W	2.69157e+06	1.4097e+06	3	3	High	High	1
High	Q06205	15	FPR4	0	210.63	54	16	156	392	43.9	4.69	256.33	16	Pf00254, Pf17800	851170	YLR449W	D6VZ83; Q06205; sce:YLR449W	2.68551e+06	520594	3	3	High	High	1	Met-loss+Acetyl [N-Term]
High	P29453	5	RPL8B	0	224.373	67	19	312	256	28.1	10.02	527.88	19	Pf01248	850682	YLL045C	D6VXW2; P29453; sce:YLL045C	2.65445e+06	1.33838e+06	3	3	High	High	1
High	P38701	6	RPS20	0	33.833	50	6	36	121	13.9	9.52	39.57	6	Pf00338	856371	YHL015W	D3DKP7; P38701; sce:YHL015W	2.61972e+06	1.36707e+06	3	3	High	High	1
High	P39015	12	STM1	0	96.15	54	12	82	273	30	9.66	114.8	12	Pf09598	850843	YLR150W	D6VYE5; P39015; sce:YLR150W	2.56586e+06	914347	3	3	High	High	1	Met-loss+Acetyl [N-Term]
High	P05317	11	RPP0	0	78.991	39	11	95	312	33.7	4.83	147.16	11	Pf00428, Pf00466, Pf17777	851052	YLR340W	D6VYX8; P05317; sce:YLR340W	2.50326e+06	1.3223e+06	3	3	High	High	1
High	P14120	6	RPL30	0	72.178	63	6	79	105	11.4	9.8	111.26	6	Pf01248	852853	YGL030W	D6VUA8; P14120; sce:YGL030W	2.44388e+06	1.21156e+06	3	3	High	High	1
High	P18239	14	PET9	0	77.438	47	14	96	318	34.4	9.79	108.86	14	Pf00153	852250	YBL030C	D6VPW9; P18239; sce:YBL030C	2.38937e+06	824291	3	3	High	High	1
High	P0C2H8	4	RPL31A	0	44.881	39	4	36	113	12.9	9.99	40.96	4	Pf01198	851484	YDL075W	D6VRS4; P04649; P0C2H8; Q3E7B8; sce:YDL075W	2.35765e+06	787337	3	3	High	High	1
High	P14127	8	RPS17B	0	59.29	54	8	35	136	15.8	10.51	36.06	8	Pf00833	852058	YDR447C	D6VT72; P14127; sce:YDR447C	2.28756e+06	960786	3	3	High	High	1
High	P46784	3	RPS10B	0	44.183	38	3	34	105	12.7	9.07	47.91	3	Pf03501	855270	YMR230W	D6W055; P46784; sce:YMR230W	2.21911e+06	1.35694e+06	3	3	High	High	1
High	Q04660	44	ERB1	0	637.653	70	44	590	807	91.6	5.17	1052.38	44	Pf00400, Pf08145	855068	YMR049C	D6VZM4; Q04660; sce:YMR049C	2.13086e+06	403236	3	3	High	High	1
High	P53261	37	NOP7	0	376.511	59	37	368	605	69.8	5.6	564.94	37	Pf06732, Pf16589	852995	YGR103W	D6VUN5; P53261; sce:YGR103W	1.96245e+06	586454	3	3	High	High	1
High	P05318	4	RPP1A	0	58.959	82	4	22	106	10.9	3.88	46.63	4	Pf00428	851478	YDL081C	D6VRR8; P05318; sce:YDL081C	1.94722e+06	1.01282e+06	3	3	High	High	1	Met-loss+Acetyl [N-Term]
High	P41903	12	TES1	0	55.416	39	12	48	349	40.2	8.79	18.69	12	Pf02551	853477	YJR019C	D6VWJ4; P41903; sce:YJR019C	1.94207e+06	775189	3	3	High	High	1
High	Q02326	4	RPL6A	0	105.86	66	14	180	176	19.9	10.1	242.92	14	Pf01159	854902	YML073C	D6VZA0; Q02326; sce:YML073C	1.91367e+06	815667	3	3	High	High	1
High	P20084	5	MRPL33	0	15.411	58	5	12	86	9.5	10.2	5.57	5	Pf00327	855330	YMR286W	D6W0B3; P20084; sce:YMR286W	1.90913e+06	789798	3	3	High	High	1
High	P49166	4	RPL37A	0	26.495	42	5	54	88	9.8	11.63	41.15	5	Pf01907	850882	YLR185W	D6VYI8; P49166; sce:YLR185W	1.85918e+06	823661	3	3	High	High	1
High	P38911	12	FPR3	0	124.266	42	13	77	411	46.5	4.46	104.65	13	Pf00254, Pf17800	854901	YML074C	D6W0K9; P38911; sce:YML074C	1.85325e+06	350441	3	3	High	High	1	Met-loss+Acetyl [N-Term]
High	P0CX52	9	RPS16B	0	55.868	64	9	67	143	15.8	10.26	55.52	9	Pf00380	851476; 855174	YDL083C; YMR143W	D6VRR6; P0CX52; P26787; P40213; sce:YDL083C; sce:YMR143W	1.84314e+06	683639	3	3	High	High	1	Met-loss+Acetyl [N-Term]
High	P53883	24	NOP13	0	149.321	58	24	115	403	45.6	9.29	124.9	24	Pf00076	855547	YNL175C	D6W110; P53883; sce:YNL175C	1.78666e+06	857409	3	3	High	High	1
High	Q12024	25	YTM1	0	387.378	71	25	295	460	51.3	6.96	491.73	25	Pf00400, Pf08154	854446	YOR272W	D6W2X2; Q12024; sce:YOR272W	1.76129e+06	382627	3	3	High	High	1
High	P0CX41	5	RPL23A	0	103.523	43	5	162	137	14.5	10.33	163.83	5	Pf00238	852191; 856853	YBL087C; YER117W	D3DM23; P04451; P0CX41; sce:YBL087C; sce:YER117W	1.73743e+06	360518	3	3	High	High	1
High	P25443	12	RPS2	0	99.292	59	12	72	254	27.4	10.43	79.83	12	Pf00333, Pf03719	852754	YGL123W	D6VU25; P25443; sce:YGL123W	1.71947e+06	1.02736e+06	3	3	High	High	1	Met-loss+Acetyl [N-Term]
High	P04840	15	POR1	0	141.226	82	15	107	283	30.4	7.93	139.51	15	Pf01459	855669	YNL055C	D6W1C3; P04840; sce:YNL055C	1.71804e+06	959291	3	3	High	High	1
High	P49167	3	RPL38	0	28.756	41	3	74	78	8.8	10.93	117.8	3	Pf01781	851035	YLR325C	D6VYW7; P49167; sce:YLR325C	1.66169e+06	554597	3	3	High	High	1
High	P38137	31	PCS60	0	366.98	68	31	283	543	60.5	9.2	441.7	31	Pf00501, Pf13193	852523	YBR222C	D6VQL9; P38137; sce:YBR222C	1.6162e+06	461989	3	3	High	High	1	Met-loss+Acetyl [N-Term]
High	P00044	4	CYC1	0	28.677	40	4	28	109	12.2	9.42	43.81	4	Pf00034	853507	YJR048W	D6VWL9; P00044; sce:YJR048W	1.61356e+06	641923	3	3	High	High	1
High	P41057	3	RPS29A	0	17.42	45	3	17	56	6.7	10.27	26.68	3	Pf00253	851104	YLR388W	A2TBM8; D6VZ23; P05761; P41057; sce:YLR388W	1.59652e+06	827478	3	3	High	High	1
High	P46654	9	RPS0B	0	82.934	65	9	43	252	27.9	4.75	50.58	9	Pf00318	850737	YLR048W	D6VY50; P46654; sce:YLR048W	1.58109e+06	702381	3	3	High	High	1	Met-loss+Acetyl [N-Term]
High	P38011	15	ASC1	0	182.087	81	15	88	319	34.8	6.24	120.22	15	Pf00400	855143	YMR116C	D6VZT9; P38011; Q6LAA5; sce:YMR116C	1.57386e+06	808174	3	3	High	High	1	Met-loss+Acetyl [N-Term]
High	P38779	25	CIC1	0	354.542	66	25	266	376	42.5	8.78	462.93	25	Pf00687	856449	YHR052W	D3DL01; P38779; sce:YHR052W	1.57036e+06	432664	3	3	High	High	1
High	P41805	9	RPL10	0	55.894	46	9	68	221	25.3	10.02	56.57	9	Pf00252	850764	YLR075W	D6VY76; P41805; sce:YLR075W	1.54404e+06	601822	3	3	High	High	1
High	P32495	5	NHP2	0	31.66	48	5	29	156	17.1	9.72	50.63	5	Pf01248	851319	YDL208W	D6VRE6; P32495; sce:YDL208W	1.48555e+06	604336	3	3	High	High	1
High	P0CX55	10	RPS18A	0	68.491	64	10	42	146	17	10.27	58.06	10	Pf00416	852061; 854982	YDR450W; YML026C	D6VT75; P0CX55; P35271; sce:YDR450W; sce:YML026C	1.44088e+06	627215	3	3	High	High	1	Met-loss+Acetyl [N-Term]
High	P51998	13	YML6	0	63.86	44	13	47	286	32	9.61	36.75	13	Pf00573	854983	YML025C	D6VZE9; P51998; sce:YML025C	1.43107e+06	502984	3	3	High	High	1
High	Q12389	54	DBP10	0	689.992	62	54	629	995	112.9	9.14	907.56	54	Pf00270, Pf00271, Pf08147	851530	YDL031W	D6VRW1; Q12389; sce:YDL031W	1.42973e+06	350221	3	3	High	High	1
High	P05756	7	RPS13	0	39.927	50	7	51	151	17	10.43	65.83	7	Pf00312, Pf08069	851636	YDR064W	D6VS50; P05756; sce:YDR064W	1.36324e+06	517607	3	3	High	High	1
High	Q3E7X9	4	RPS28A	0	22.157	52	4	29	67	7.6	10.78	32.46	4	Pf01200	854338	YOR167C	D6W2M5; P02380; Q3E7X9; sce:YOR167C	1.33303e+06	453201	3	3	High	High	1
High	P32787	13	MGM101	0	79.23	54	13	37	269	30.1	9.32	50.46	13	Pf06420	853609	YJR144W	D6VWW3; P32787; sce:YJR144W	1.31504e+06	602243	3	3	High	High	1
High	P36080	13	RRP14	0	108.401	34	13	87	434	50.5	9.57	106.29	13	Pf04935, Pf15459	853780	YKL082C	D6VXK5; P36080; sce:YKL082C	1.30793e+06	398600	3	3	High	High	1	Met-loss+Acetyl [N-Term]
High	P40007	12	NOP16	0	92.846	59	12	64	231	26.9	9.26	97.26	12	Pf09420	856719	YER002W	D3DLP8; P40007; sce:YER002W	1.29163e+06	285265	3	3	High	High	1
High	P28007	5	GAR1	0	58.743	36	5	36	205	21.5	11.46	56.84	5	Pf04410	856489	YHR089C	D3DL41; P28007; sce:YHR089C	1.28703e+06	476357	3	3	High	High	1
High	P36534	12	MRPL40	0	73.778	47	12	46	297	33.7	9.45	45.58	12		855930	YPL173W	D6W3J5; P36534; Q6B277; sce:YPL173W	1.21355e+06	421895	3	3	High	High	1	Met-loss+Acetyl [N-Term]
High	Q04373	31	PUF6	0	287.828	58	31	294	656	75.1	6.89	379.74	31	Pf00806, Pf08144	852107	YDR496C	D6VTB8; Q04373; sce:YDR496C	1.21007e+06	421487	3	3	High	High	1
High	P34760	11	TSA1	0	79.171	74	11	45	196	21.6	5.14	59.77	11	Pf00578, Pf10417	854980	YML028W	D6VZE6; P34760; sce:YML028W	1.19832e+06	445369	3	3	High	High	1
High	P37838	32	NOP4	0	282.11	49	32	274	685	77.8	9.06	385.34	32	Pf00076	856063	YPL043W	D6W3X0; P37838; sce:YPL043W	1.16826e+06	293334	3	3	High	High	1
High	P53136	29	NSA1	0	339.559	70	29	231	463	51.9	7.84	348.69	29		852767	YGL111W	D6VU36; P53136; sce:YGL111W	1.15279e+06	284130	3	3	High	High	1
High	Q3E792	3	RPS25A	0	11.335	26	3	15	108	12	10.32	11.33	3	Pf03297	852911	YGR027C	A2TBN4; D6VUG0; P05758; P07282; Q3E792; Q45U56; sce:YGR027C	1.14151e+06	465630	3	3	High	High	1
High	P19262	9	KGD2	0	71.768	23	9	29	463	50.4	8.85	35.63	9	Pf00198, Pf00364	851726	YDR148C	D6VSD1; P19262; sce:YDR148C	1.13519e+06	515551	3	3	High	High	1
High	P05750	15	RPS3	0	100.25	73	15	80	240	26.5	9.41	98.1	15	Pf00189, Pf07650	855543	YNL178W	D6W107; P05750; sce:YNL178W	1.13486e+06	497359	3	3	High	High	1
High	P39939	3	RPS26B	0	12.45	26	3	11	119	13.4	10.9	10.8	3	Pf01283	856868	YER131W	A2TBN5; D3DM37; P39939; Q6B2E8; sce:YER131W	1.11661e+06	387382	3	3	High	High	1
High	P36523	9	MRPL15	0	41.092	42	9	25	253	28.2	9.25	30	9	Pf00636	851022	YLR312W-A	D6VYV6; O13551; P36523; P89101; sce:YLR312W-A	1.09075e+06	423725	3	3	High	High	1
High	P12687	14	MRP7	0	81.596	42	14	39	371	43.2	9.82	39.46	14	Pf01016, Pf18471	855727	YNL005C	D6W1H2; P12687; sce:YNL005C	1.08973e+06	371844	3	3	High	High	1
High	P0CX35	15	RPS4A	0	62.741	52	15	63	261	29.4	10.08	58.9	15	Pf00467, Pf00900, Pf01479, Pf08071, Pf16121	853610; 856610	YHR203C; YJR145C	D3DLF2; P05753; P0CX35; sce:YHR203C; sce:YJR145C	1.07467e+06	375970	3	3	High	High	1
High	P40078	14	NSA2	0	159.896	48	14	164	261	29.7	10.24	251.35	14	Pf01201	856863	YER126C	D3DM32; P40078; sce:YER126C	1.07429e+06	210813	3	3	High	High	1	Met-loss+Acetyl [N-Term]
High	P00830	23	ATP2	0	246.391	69	23	103	511	54.8	5.71	143.95	23	Pf00006, Pf02874	853585	YJR121W	D6VWU0; P00830; sce:YJR121W	1.06598e+06	446685	3	3	High	High	1
High	P48164	6	RPS7B	0	57.435	61	11	72	190	21.6	9.92	65.38	11	Pf01251	855628	YNL096C	D6W184; P48164; sce:YNL096C	1.06214e+06	771481	3	3	High	High	1
High	P53927	8	NOP15	0	140.194	51	8	122	220	25.4	9.28	177.58	8	Pf00076	855613	YNL110C	D6W171; P53927; sce:YNL110C	1.06073e+06	211614	3	3	High	High	1
High	P23301	9	HYP2	0	98.917	56	9	45	157	17.1	4.96	46.07	9	Pf01287, Pf21485	856677	YEL034W	D3DLL5; P23301; sce:YEL034W	1.05615e+06	425749	3	3	High	High	1
High	P32387	10	MRP20	0	31.305	37	10	21	263	30.5	9.42	8.39	10	Pf00276	852014	YDR405W	D6VT37; P32387; sce:YDR405W	1.0446e+06	370128	3	3	High	High	1
High	P25642	7	IMG2	0	31.731	48	7	31	146	16.4	9.85	26.53	7	Pf05046	850434	YCR071C	D6VR73; P25642; Q6B2B0; Q96VG7; sce:YCR071C	1.03207e+06	380546	3	3	High	High	1
High	P33322	19	CBF5	0	197.761	55	19	91	483	54.7	8.9	104.14	19	Pf01472, Pf01509, Pf08068, Pf16198	850872	YLR175W	D6VYH9; P33322; sce:YLR175W	995133	431297	3	3	High	High	1
High	P36528	12	MRPL17	0	71.163	44	12	45	281	32.2	9.06	46.94	12	Pf11788	855469	YNL252C	D6W0U1; P36528; sce:YNL252C	994841	366670	3	3	High	High	1
High	P36517	10	MRPL4	0	45.548	36	10	36	319	36.9	7.65	31.86	10	Pf06984	851160	YLR439W	D6VZ74; P36517; sce:YLR439W	984236	332170	3	3	High	High	1
High	P21304	24	PWP1	0	164.861	65	24	75	576	63.8	4.61	76.96	24	Pf00400	850893	YLR196W	D6VYJ9; P21304; sce:YLR196W	957924	177048	3	3	High	High	1
High	P04147	24	PAB1	0	173.02	57	24	95	577	64.3	5.97	114.75	24	Pf00076, Pf00658	856912	YER165W	D3DM73; P04147; sce:YER165W	922474	374428	3	3	High	High	1
High	P53254	53	UTP22	0	350.278	58	53	199	1237	140.4	8.46	223.84	53	Pf03813, Pf17403, Pf17404, Pf17405, Pf17406, Pf17407	852982	YGR090W	D6VUM2; P53254; sce:YGR090W	871546	562225	3	3	High	High	1
High	P38934	16	BFR1	0	58.757	34	16	31	470	54.6	9.19	15.97	16		854373	YOR198C	D6W2Q7; P38934; sce:YOR198C	869028	439938	3	3	High	High	1
High	Q01560	9	NPL3	0	59.447	27	9	30	414	45.4	5.54	22.86	9	Pf00076	852042	YDR432W	D6VT60; Q01560; sce:YDR432W	829746	308559	3	3	High	High	1
High	P26784	8	RPL16A	0	75.184	52	14	111	199	22.2	10.48	124.38	14	Pf00572	854673	YIL133C	D6VVF4; P26784; sce:YIL133C	828788	272693	3	3	High	High	1	Met-loss+Acetyl [N-Term]
High	P25617	11	YCR016W	0	54.159	44	11	36	290	33.6	7.93	28.73	11	Pf10180	850375	YCR016W	D6VR24; P25617; Q8NIM2; sce:YCR016W	813483	361643	3	3	High	High	1	Met-loss+Acetyl [N-Term]
High	P53881	10	MRPL22	0	40.432	36	10	29	309	34.9	9.98	16.41	10	Pf00237	855544	YNL177C	D6W108; P53881; sce:YNL177C	791713	282603	3	3	High	High	1
High	P25087	15	ERG6	0	96.653	46	15	47	383	43.4	5.77	58.31	15	Pf08241, Pf08498	855003	YML008C	D6VZG6; P25087; sce:YML008C	783128	357948	3	3	High	High	1
High	Q04599	10	MRPL1	0	69.656	48	10	47	285	31	9.96	64.8	10	Pf00687	851694	YDR116C	D6VSA1; Q04599; sce:YDR116C	781199	323266	3	3	High	High	1
High	P38805	20	RPF1	0	165.443	63	20	115	295	35.1	9.47	154.31	20	Pf04427	856488	YHR088W	D3DL40; P38805; sce:YHR088W	780247	159403	3	3	High	High	1
High	P15646	15	NOP1	0	130.445	51	15	97	327	34.4	10.24	151.18	15	Pf01269	851548	YDL014W	D6VRX5; P15646; P89890; sce:YDL014W	773200	225774	3	3	High	High	1
High	Q08492	8	BUD21	0	42.136	40	8	19	214	24.4	6.6	20.86	8	Pf08297	854245	YOR078W	D6W2E1; O00033; Q08492; sce:YOR078W	768874	139850	3	3	High	High	1
High	P22354	5	MRPL20	0	32.937	29	5	14	195	22.4	10.18	17.64	5	Pf12824	853960	YKR085C	D6VXE5; P22354; sce:YKR085C	750174	196848	3	3	High	High	1
High	Q03104	12	MSC1	0	79.843	29	12	32	513	59.6	7.58	32.19	12	Pf10281	854911	YML128C	D6W0F7; Q03104; sce:YML128C	745576	368079	3	3	High	High	1
High	Q04305	21	UTP15	0	142.647	62	21	47	513	57.7	9.31	74.42	21	Pf00400, Pf09384	855118	YMR093W	D6VZR6; Q04305; sce:YMR093W	740448	315838	3	3	High	High	1
High	P36103	10	YKL023W	0	65.87	42	10	34	277	32.3	8.97	38.33	10		853845	YKL023W	D6VXR2; P36103; sce:YKL023W	739983	303567	3	3	High	High	1
High	P36520	10	MRPL10	0	41.301	32	10	36	322	36.3	10.36	16.85	10	Pf00828	855436	YNL284C	D6W0R0; P36520; P36524; sce:YNL284C	738039	226733	3	3	High	High	1
High	P40531	10	GVP36	0	70.4	40	10	30	326	36.6	4.97	40.05	10	Pf10455	854770	YIL041W	D6VVP1; P40531; sce:YIL041W	722069	377090	3	3	High	High	1
High	P36519	8	MRPL7	0	57.003	41	8	23	292	33.1	9.67	25.02	8	Pf00281, Pf00673	851823	YDR237W	D6VSL8; E9P8T1; P36519; sce:YDR237W	712904	247448	3	3	High	High	1
High	Q06090	4	MRPL51	0	16.989	29	4	9	140	16.1	10.45	9.81	4	Pf05047	856214	YPR100W	D6W498; Q06090; sce:YPR100W	687765	250108	3	3	High	High	1
High	Q02207	46	FOX2	0	329.326	70	46	124	900	98.6	9	164.68	46	Pf00106, Pf01575	853878	YKR009C	D6VX75; Q02207; sce:YKR009C	678905	303502	3	3	High	High	1
High	P60010	9	ACT1	0	50.655	32	9	28	375	41.7	5.68	18.6	9	Pf00022	850504	YFL039C	D6VTJ1; P02579; P60010; Q9P3X6; Q9P3X7; sce:YFL039C	671929	458796	3	3	High	High	1
High	Q12487	4	MRPL23	0	14.507	29	4	11	163	18.5	10.11	4.48	4	Pf00572	854321	YOR150W	D6W2K7; Q12487; sce:YOR150W	660288	246553	3	3	High	High	1
High	P12695	13	LAT1	0	55.46	29	13	40	482	51.8	7.8	38.23	13	Pf00198, Pf00364, Pf02817	855653	YNL071W	D6W1A8; P12695; sce:YNL071W	658140	301806	3	3	High	High	1
High	P36527	4	MRPL28	0	17.167	27	4	11	147	17.3	10.49	7.02	4	Pf09812	852073	YDR462W	D6VT87; P36527; Q00949; sce:YDR462W	655507	223164	3	3	High	High	1
High	Q06678	16	MRPL35	0	95.071	53	16	64	367	42.8	9.51	65.41	16	Pf01161	851921	YDR322W	D6VSV4; Q06678; sce:YDR322W	652938	265719	3	3	High	High	1
High	P37292	20	SHM1	0	120.862	51	21	80	490	53.7	8.72	64.55	21	Pf00464	852565	YBR263W	D6VQR0; P37292; sce:YBR263W	649315	502755	3	3	High	High	1
High	P39985	46	POL5	0	407.065	57	46	256	1022	115.8	5.33	342.64	46	Pf04931	856655	YEL055C	D3DLJ5; P39985; Q9Y737; sce:YEL055C	637064	285077	3	3	High	High	1
High	P36521	10	MRPL11	0	46.124	42	10	43	249	28.5	9.7	42.92	10	Pf00466	851325	YDL202W	D6VRF2; P36521; Q12313; sce:YDL202W	624122	257781	3	3	High	High	1
High	P32892	41	DRS1	0	557.549	60	41	415	752	84.8	5.74	650.81	41	Pf00270, Pf00271	850652	YLL008W	D6VXZ4; P32892; sce:YLL008W	622976	144313	3	3	High	High	1
High	P25368	10	RRP7	0	95.88	51	10	33	297	34.4	8.87	45.6	10	Pf12923, Pf17799	850326	YCL031C	D6VQY4; P25368; sce:YCL031C	620129	313426	3	3	High	High	1
High	Q02486	6	ABF2	0	26.624	34	6	17	183	21.5	9.69	11.29	6	Pf00505	855094	YMR072W	D6VZP6; Q02486; Q712M5; sce:YMR072W	619518	164081	3	3	High	High	1
High	P32481	18	GCD11	0	103.673	45	18	51	527	57.8	6.8	57.33	18	Pf00009, Pf03144, Pf09173	856746	YER025W	D3DLS4; P32481; sce:YER025W	609524	456268	3	3	High	High	1
High	P40693	14	RLP7	0	117.763	47	14	100	322	36.5	9.45	162.1	14	Pf00327	855730	YNL002C	D6W1H5; P40693; sce:YNL002C	597414	153891	3	3	High	High	1
High	P0CX26	3	RPL43B	0	29.175	38	3	14	92	10.1	10.42	19.61	3	Pf01780	853557; 856156	YJR094W-A; YPR043W	D6VWR3; P0CX26; P49631; sce:YJR094W-A; sce:YPR043W	591945	158555	3	3	High	High	1
High	P35691	6	TMA19	0	21.604	33	6	11	167	18.7	4.56	6.2	6	Pf00838	853809	YKL056C	D6VXN1; P35691; sce:YKL056C	587189	289141	3	3	High	High	1
High	P36060	9	MCR1	0	42.855	37	9	18	302	34.1	8.65	9.44	9	Pf00175, Pf00970	853707	YKL150W	A2TBM9; D6VX47; P36060; sce:YKL150W	583108	304298	3	3	High	High	1
High	Q12118	14	SGT2	0	98.966	68	14	47	346	37.2	4.79	49.03	14	Pf00515, Pf16546	854168	YOR007C	D6W273; Q12118; sce:YOR007C	582048	123254	3	3	High	High	1
High	P23369	5	MRPL25	0	16.532	28	5	12	157	18.6	10.04	6.46	5	Pf18126	852967	YGR076C	D6VUK8; P23369; sce:YGR076C	580999	175092	3	3	High	High	1
High	P50095	7	IMD3	0	260.446	57	20	174	523	56.5	7.4	219.7	20	Pf00478, Pf00571	851152	YLR432W	D6VZ67; P50095; sce:YLR432W	568377	1.17019e+06	3	3	High	High	1
High	P38248	4	ECM33	0	30.66	11	4	12	429	43.7	4.91	15.13	4		852370	YBR078W	D6VQ77; P38248; P89498; sce:YBR078W	565840	260771	3	3	High	High	1
High	P51402	3	RPL37B	0	16.454	39	4	19	88	9.9	11.8	18.42	4	Pf01907	852111	YDR500C	D6VTC2; P51402; sce:YDR500C	547099	199853	3	3	High	High	1
High	Q00055	5	GPD1	0	15.186	18	5	10	391	42.8	5.47	3.93	5	Pf01210, Pf07479	851539	YDL022W	A5YWB0; D6VRW8; Q00055; Q6J5J2; Q6J5J5; sce:YDL022W	529585	222712	3	3	High	High	1
High	P33399	13	LHP1	0	78.784	60	13	48	275	32.1	8.54	53.36	13	Pf00076, Pf05383	851509	YDL051W	D6VRU5; P33399; sce:YDL051W	527754	341623	3	3	High	High	1
High	P00359	11	TDH3	0	54.684	43	11	30	332	35.7	6.96	11.78	11	Pf00044, Pf02800	853106	YGR192C	D6VUX4; P00359; Q6Q5P9; sce:YGR192C	526212	360151	3	3	High	High	1
High	P32796	19	CAT2	0	106.962	36	19	53	670	77.2	8.22	34.45	19	Pf00755	854965	YML042W	D6VZD3; P32796; sce:YML042W	519496	271690	3	3	High	High	1
High	P25586	12	KRR1	0	43.09	35	12	33	316	37.1	9.39	18.21	12	Pf17903, Pf21800	850298	YCL059C	D6VQV7; P25586; sce:YCL059C	514338	336155	3	3	High	High	1
High	P07251	23	ATP1	0	163.946	56	23	92	545	58.6	9.04	112.26	23	Pf00006, Pf00306, Pf02874	852177	YBL099W	D6VPQ6; P07251; Q92449; sce:YBL099W	509922	279432	3	3	High	High	1
High	P39990	4	SNU13	0	26.773	50	4	22	126	13.6	7.85	30.96	4	Pf01248	856687	YEL026W	D3DLM2; P39990; sce:YEL026W	502587	117983	3	3	High	High	1
High	Q12692	3	HTZ1	0	24.448	30	4	48	134	14.3	10.65	40.12	4	Pf00125, Pf16211	854150	YOL012C	D6W255; Q12692; sce:YOL012C	483555	374674	3	3	High	High	1
High	P36526	6	MRPL27	0	25.361	35	6	13	146	16.5	10.13	8.77	6	Pf09809	852585	YBR282W	D6VQS7; P36526; sce:YBR282W	482078	145114	3	3	High	High	1
High	P32611	8	RML2	0	28.175	20	8	22	393	43.8	10.78	15.45	8	Pf00181, Pf03947	856660	YEL050C	D3DLK0; P32611; sce:YEL050C	470501	141300	3	3	High	High	1
High	P38202	3	YBL028C	0	31.639	19	3	29	106	12.4	10.18	35.55	3	Pf10338	852253	YBL028C	D6VPX2; P38202; sce:YBL028C	470482	85805.3	3	3	High	High	1
High	P19454	16	CKA2	0	88.626	55	16	47	339	39.4	8.53	62.1	16	Pf00069	854227	YOR061W	D6W2C4; P19454; sce:YOR061W	465993	261339	3	3	High	High	1
High	P20081	7	FPR1	0	33.537	66	7	17	114	12.2	6.04	14.82	7	Pf00254	855587	YNL135C	D6W147; P20081; sce:YNL135C	461531	159780	3	3	High	High	1	Met-loss+Acetyl [N-Term]
High	P31334	5	MRPL9	0	34.057	22	5	14	269	29.8	10.18	10.24	5	Pf00297	853135	YGR220C	D6VV02; P31334; sce:YGR220C	454983	129783	3	3	High	High	1
High	P17967	17	PDI1	0	80.298	40	17	39	522	58.2	4.53	29.68	17	Pf00085, Pf13848	850314	YCL043C	D6VQX3; P17967; sce:YCL043C	440514	126235	3	3	High	High	1
High	P32388	3	MRP49	0	17.925	28	3	13	137	16	9.36	15.37	3	Pf05047	853687	YKL167C	D6VX32; P32388; sce:YKL167C	436933	148337	3	3	High	High	1
High	P25626	8	IMG1	0	38.676	54	8	22	169	19.4	10.39	16.53	8	Pf01245	850413	YCR046C	D6VR55; P25626; sce:YCR046C	436191	163260	3	3	High	High	1
High	P07257	16	QCR2	0	79.892	52	16	48	368	40.5	7.96	35.34	16	Pf00675	856321	YPR191W	D6W4J1; P07257; sce:YPR191W	434439	208565	3	3	High	High	1
High	Q06679	28	UTP4	0	237.792	49	28	83	776	87.7	6.57	125.75	28	Pf00400	851924	YDR324C	D6VSV7; Q06679; sce:YDR324C	423256	94511.1	3	3	High	High	1
High	P10591	6	SSA1	0	287.346	67	33	159	642	69.6	5.11	205.87	33	Pf00012	851259	YAL005C	D6VPL2; P10591; sce:YAL005C	414984	154903	3	3	High	High	1
High	P53972	30	RCM1	0	330.717	70	30	258	490	56.1	8.73	420.9	30	Pf01189, Pf21153	855709	YNL022C	D6W1F7; P53972; sce:YNL022C	411907	70962.8	3	3	High	High	1
High	Q04947	12	RTN1	0	105.174	54	12	49	295	32.9	8.98	66.83	12	Pf02453	851819	YDR233C	D6VSL4; Q04947; sce:YDR233C	411694	159526	3	3	High	High	1	Met-loss+Acetyl [N-Term]
High	P16521	19	YEF3	0	112.712	32	24	49	1044	115.9	6.05	28.18	24	Pf00005, Pf17947	850951	YLR249W	D6VYP7; O93815; P16521; Q06558; sce:YLR249W	411535	176926	3	3	High	High	1
High	P22353	8	MRPL8	0	32.191	39	8	17	238	26.9	9.8	8.55	8	Pf01196, Pf18502	853382	YJL063C	D6VWB8; P22353; sce:YJL063C	411413	144397	3	3	High	High	1
High	P38789	4	SSF1	0	241.45	54	18	125	453	51.7	9.26	187.12	18	Pf04427	856463	YHR066W	D3DL15; P38789; sce:YHR066W	410271	114131	3	3	High	High	1
High	P33750	18	SOF1	0	99.223	45	18	48	489	56.8	9.41	40.73	18	Pf00400, Pf04158	850649	YLL011W	D6VXZ1; P33750; sce:YLL011W	409115	75557	3	3	High	High	1
High	P25694	30	CDC48	0	190.951	54	30	99	835	91.9	4.94	83.88	30	Pf00004, Pf02359, Pf02933, Pf17862	851431	YDL126C	D6VRM4; P25694; sce:YDL126C	406881	178804	3	3	High	High	1
High	P16387	9	PDA1	0	39.446	24	9	31	420	46.3	8.1	18.45	9	Pf00676	856925	YER178W	D3DM87; P16387; sce:YER178W	395084	184212	3	3	High	High	1
High	Q06511	11	RRP15	0	85.971	43	11	54	250	28.2	5.76	72.51	11	Pf07890	856264	YPR143W	D6W4E0; Q06511; sce:YPR143W	391800	135930	3	3	High	High	1
High	P38219	11	OLA1	0	52.17	35	11	28	394	44.1	7.43	19.37	11	Pf01926, Pf06071	852313	YBR025C	D6VQ27; P38219; sce:YBR025C	376524	147312	3	3	High	High	1
High	P53141	8	MLC1	0	52.292	64	8	22	149	16.4	4.73	14.88	8		852772	YGL106W	D6VU40; P53141; sce:YGL106W	375447	96597.8	3	3	High	High	1
High	P32471	6	EFB1	0	33.005	39	6	13	206	22.6	4.45	11.6	6	Pf00736, Pf10587	851260	YAL003W	D6VPL3; P32471; sce:YAL003W	369542	89972.1	3	3	High	High	1
High	P15108	20	HSC82	0	89.84	33	20	44	705	80.9	4.83	35.14	20	Pf00183, Pf13589	855224	YMR186W	D6W010; P15108; sce:YMR186W	365186	232643	3	3	High	High	1
High	P28241	8	IDH2	0	52.751	27	8	30	369	39.7	8.69	31.81	8	Pf00180	854303	YOR136W	D6W2J3; P28241; sce:YOR136W	364138	180848	3	3	High	High	1
High	P15731	3	UBC4	0	16.34	30	3	6	148	16.4	6.52	2.48	3	Pf00179	852376	YBR082C	D6VQ81; P15731; sce:YBR082C	360404	160986	3	3	High	High	1
High	P38882	27	UTP9	0	201.882	64	27	70	575	65.2	4.86	89.45	27		856603	YHR196W	D3DLE4; P38882; sce:YHR196W	355933	104122	3	3	High	High	1
High	P15424	28	MSS116	0	133.766	48	28	85	664	76.2	8.98	88.27	28	Pf00270, Pf00271	851775	YDR194C	D6VSH6; P15424; sce:YDR194C	354765	238010	3	3	High	High	1
High	P15891	15	ABP1	0	64.864	34	15	34	592	65.5	4.68	34.15	15	Pf00018, Pf00241	850450	YCR088W	D6VR88; P15891; sce:YCR088W	345346	114649	3	3	High	High	1	Met-loss+Acetyl [N-Term]
High	P38912	7	TIF11	0	25.54	42	7	19	153	17.4	4.83	13.39	7	Pf01176	855302	YMR260C	D6W086; P38912; sce:YMR260C	336403	89197.4	3	3	High	High	1
High	P22146	7	GAS1	0	51.7	15	7	15	559	59.5	4.67	16.5	7	Pf03198, Pf07983	855355	YMR307W	D6W0D4; P22146; P23151; sce:YMR307W	336087	180594	3	3	High	High	1
High	P36525	8	MRPL24	0	29.055	33	8	22	258	30	10.13	2.45	8	Pf00830	855231	YMR193W	D6W017; P36525; sce:YMR193W	331115	94624.8	3	3	High	High	1
High	P15790	13	CKA1	0	76.105	40	13	39	372	44.6	8.59	37.09	13	Pf00069	854776	YIL035C	D6VVP7; P15790; sce:YIL035C	330334	169612	3	3	High	High	1
High	P42846	13	KRI1	0	57.923	25	13	21	591	68.6	5.1	23.9	13	Pf05178, Pf12936	855408	YNL308C	D6W0N7; P42846; sce:YNL308C	329979	117436	3	3	High	High	1
High	P50094	8	IMD4	0	149.968	44	16	129	524	56.4	8.16	158.6	16	Pf00478, Pf00571	854948	YML056C	D6VZB8; P50094; Q2VQW8; sce:YML056C	326735	459009	3	3	High	High	1	Met-loss+Acetyl [N-Term]
High	Q03048	5	COF1	0	37.608	62	5	14	143	15.9	5.2	13.36	5	Pf00241	850676	YLL050C	D6VXV8; Q03048; Q05307; Q2XN65; sce:YLL050C	317156	103447	3	3	High	High	1
High	Q06698	42	YLR419W	0	203.951	38	42	86	1435	162.9	9.1	70.38	42	Pf00270, Pf00271, Pf05773, Pf07717	851137	YLR419W	D6VZ55; Q06698; sce:YLR419W	312979	179114	3	3	High	High	1
High	P39676	10	YHB1	0	59.163	43	10	24	399	44.6	6.28	20.08	10	Pf00042, Pf00175, Pf00970	853149	YGR234W	D6VV14; P39676; Q6B1W6; Q9C1R6; sce:YGR234W	300771	99927.4	3	3	High	High	1
High	P36531	6	MRPL36	0	51.462	46	6	20	177	20.1	9.72	27.05	6	Pf21492	852419	YBR122C	D6VQC0; P36531; sce:YBR122C	294613	105341	3	3	High	High	1
High	P38077	10	ATP3	0	43.474	36	10	34	311	34.3	9.31	28.2	10	Pf00231	852327	YBR039W	D6VQ39; P38077; Q54AF5; Q76MT6; sce:YBR039W	292282	208403	3	3	High	High	1
High	P26754	10	RFA2	0	72.486	72	11	32	273	29.9	4.98	22.93	11	Pf01336, Pf08784	855404	YNL312W	D6W0N3; P26754; P38905; sce:YNL312W	290039	100212	3	3	High	High	1	Met-loss+Acetyl [N-Term]
High	P09457	7	ATP5	0	34.251	42	7	14	212	22.8	9.57	18.94	7	Pf00213	851892	YDR298C	D6VSS7; P09457; sce:YDR298C	282244	147120	3	3	High	High	1
High	Q02204	4	MRPL13	0	26.549	28	4	10	264	30.3	8.92	8.03	4	Pf10501	853875	YKR006C	D6VX72; Q02204; sce:YKR006C	273408	118244	3	3	High	High	1
High	P07256	10	COR1	0	39.826	27	10	18	457	50.2	7.3	14.34	10	Pf00675, Pf05193	852235	YBL045C	D6VPV3; P07256; sce:YBL045C	261150	120461	3	3	High	High	1
High	P38071	9	ETR1	0	35.183	37	9	16	380	42	9	7.74	9		852314	YBR026C	D6VQ28; P38071; Q6Q5P2; sce:YBR026C	260735	126412	3	3	High	High	1
High	P25293	5	NAP1	0	27.801	20	5	9	417	47.9	4.34	12.05	5	Pf00956	853922	YKR048C	D6VXA9; P25293; P87196; sce:YKR048C	260108	104872	3	3	High	High	1
High	P05626	10	ATP4	0	67.038	41	10	32	244	26.9	9.13	32.91	10	Pf05405	856027	YPL078C	D6W3T8; E9P905; P05626; Q02830; sce:YPL078C	257952	139274	3	3	High	High	1
High	P19882	17	HSP60	0	104.362	39	17	41	572	60.7	5.31	45.54	17	Pf00118	850963	YLR259C	D6VYQ6; P19882; sce:YLR259C	257294	176041	3	3	High	High	1
High	P10659	4	SAM1	0	76.931	33	8	22	382	41.8	5.22	25.62	8	Pf00438, Pf02772, Pf02773	850877	YLR180W	D6VYI4; P10659; sce:YLR180W	255525	140214	3	3	High	High	1
High	P15992	5	HSP26	0	15.756	31	5	8	214	23.9	5.53	1.94	5	Pf00011	852364	YBR072W	D6VQ71; P15992; Q6B1V5; sce:YBR072W	252496	47737.2	3	3	High	High	1
High	P20459	10	SUI2	0	59.045	44	10	20	304	34.7	5.02	25.68	10	Pf00575, Pf07541	853463	YJR007W	D6VWI2; E9P8T6; P20459; sce:YJR007W	250481	136513	3	3	High	High	1
High	P32366	6	VMA6	0	46.867	26	6	19	345	39.8	4.6	16.29	6	Pf01992	851168	YLR447C	D6VZ81; P32366; sce:YLR447C	246444	126037	3	3	High	High	1
High	P17555	9	SRV2	0	45.575	22	9	26	526	57.5	5.64	13.93	9	Pf01213, Pf08603	855584	YNL138W	D6W144; P17555; sce:YNL138W	239722	114057	3	3	High	High	1
High	P06778	16	RAD52	0	79.137	39	16	30	471	52.4	8.22	20.98	16	Pf04098	854976	YML032C	D6VZE2; P06778; sce:YML032C	237121	89379.5	3	3	High	High	1
High	P38616	4	YGP1	0	15.593	14	4	9	354	37.3	5.44	1.98	4		855562	YNL160W	D6W123; P38616; sce:YNL160W	234121	85645.7	3	3	High	High	1
High	Q12754	48	RRP12	0	356.673	51	48	153	1228	137.4	7.02	173.99	48	Pf08161	856095	YPL012W	D6W400; Q12754; Q7LH12; sce:YPL012W	220155	102037	3	3	High	High	1
High	P38175	3	MRP21	0	7.816	14	3	4	177	20.4	10.52	1.79	3	Pf01165	852188	YBL090W	D6VPR4; P38175; sce:YBL090W	220128	48725	3	3	High	High	1
High	P52910	8	ACS2	0	31.289	14	8	30	683	75.4	6.68	24.62	8	Pf00501, Pf13193, Pf16177	850846	YLR153C	D6VYE8; P52910; sce:YLR153C	206335	102824	3	3	High	High	1
High	Q07623	6	NOP6	0	36.68	40	6	18	225	25.2	10.08	13.05	6		851313	YDL213C	D6VRE1; Q07623; sce:YDL213C	200554	97133.3	3	3	High	High	1
High	Q12339	10	UTP23	0	54.63	50	10	21	254	28.8	10.04	21.28	10	Pf04900	854165	YOR004W	D6W270; Q12339; sce:YOR004W	199522	115271	3	3	High	High	1
High	P35194	72	UTP20	0	401.871	37	72	142	2493	287.4	7.03	145.51	72	Pf07539, Pf20416	852282	YBL004W	D6VPZ8; P35194; sce:YBL004W	196846	63927.8	3	3	High	High	1
High	P40312	4	CYB5	0	32.824	61	4	15	120	13.3	4.49	11.9	4	Pf00173	855612	YNL111C	D6W170; P40312; sce:YNL111C	195834	80732.5	3	3	High	High	1
High	P14020	12	DPM1	0	102.193	58	12	46	267	30.3	7.88	49.44	12	Pf00535	856313	YPR183W	D6W4I3; P14020; sce:YPR183W	187345	81697.8	3	3	High	High	1	Met-loss+Acetyl [N-Term]
High	P32191	15	GUT2	0	68.335	31	15	30	649	72.3	7.9	13.44	15	Pf01266, Pf16901	854651	YIL155C	D6VVD2; E9P8Y2; P32191; sce:YIL155C	183201	98781.1	3	3	High	High	1
High	P36139	7	PET10	0	31.881	29	7	15	283	31.2	8.16	14.68	7	Pf17316	853920	YKR046C	D6VXA8; P36139; sce:YKR046C	179810	71314.8	3	3	High	High	1
High	Q08096	12	RCL1	0	56.676	39	12	29	367	40.1	8.84	23.69	12	Pf01137, Pf05189	854152	YOL010W	D6W257; Q08096; sce:YOL010W	179506	74440	3	3	High	High	1
High	P02557	6	TUB2	0	31.976	20	6	14	457	50.9	4.75	12.89	6	Pf00091, Pf03953	850506	YFL037W	D6VTJ3; P02557; sce:YFL037W	178803	103885	3	3	High	High	1
High	P08431	9	GAL7	0	36.512	31	9	16	366	42.4	7.58	14.88	9	Pf01087, Pf02744	852306	YBR018C	D6VQ20; P04398; P08431; sce:YBR018C	168631	62863.1	3	3	High	High	1
High	P40008	6	FMP52	0	25.58	32	6	13	231	25.1	9.25	6.47	6	Pf08732	856721	YER004W	D3DLQ0; P40008; sce:YER004W	165845	69682.4	3	3	High	High	1
High	P12385	12	SUP45	0	48.356	35	12	31	437	49	5.05	7.9	12	Pf03463, Pf03464, Pf03465	852440	YBR143C	D6VQD9; P12385; sce:YBR143C	165295	82972.5	3	3	High	High	1
High	P26755	4	RFA3	0	34.785	50	4	11	122	13.8	4.79	9.95	4	Pf08661	853266	YJL173C	D6VW15; P26755; sce:YJL173C	163052	46253.3	3	3	High	High	1
High	P22203	6	VMA4	0	27.503	29	6	13	233	26.5	5.36	9.4	6	Pf01991	854509	YOR332W	D6W328; P22203; sce:YOR332W	159349	112557	3	3	High	High	1
High	P47019	5	ALB1	0	23.111	29	5	18	175	19.3	10.02	14.24	5	Pf09135	853320	YJL122W	D6VW64; P47019; sce:YJL122W	149689	50589.8	3	3	High	High	1
High	P54000	5	SUB1	0	26.381	21	5	12	292	33.1	5.63	9.85	5	Pf02229	855055	YMR039C	D6VZL4; P54000; sce:YMR039C	146573	63482.1	3	3	High	High	1
High	P25343	5	RVS161	0	27.709	23	5	10	265	30.2	6.62	9.14	5	Pf03114	850367	YCR009C	D6VR18; P25343; sce:YCR009C	146452	76945.5	3	3	High	High	1
High	P16140	16	VMA2	0	86.409	43	16	32	517	57.7	5.07	26.6	16	Pf00006, Pf02874	852424	YBR127C	D6VQC4; P16140; P32123; sce:YBR127C	145461	71374.3	3	3	High	High	1
High	P40513	3	MAM33	0	11.137	10	3	5	266	30.1	4.58	5.69	3	Pf02330	854740	YIL070C	D6VVL4; P40513; Q6Q5P4; sce:YIL070C	140142	65751.4	3	3	High	High	1
High	P06105	18	SCP160	0	58.011	17	18	34	1222	134.7	5.85	12.89	18	Pf00013	853365	YJL080C	D6VWA3; P06105; sce:YJL080C	140128	89057.3	3	3	High	High	1
High	Q12449	7	AHA1	0	24.297	24	7	12	350	39.4	7.47	1.64	7	Pf08327, Pf09229	851800	YDR214W	D6VSJ8; Q02565; Q12449; Q7LIE3; sce:YDR214W	132696	53163	3	3	High	High	1
High	P28000	4	RPC19	0	33.364	54	4	9	142	16.1	4.41	6.62	4	Pf01193, Pf13656	855609	YNL113W	D6W168; P28000; sce:YNL113W	129733	37271	3	3	High	High	1
High	P46672	6	ARC1	0	18.709	25	6	11	376	42.1	7.88	0	6	Pf01588	852773	YGL105W	D6VU41; P46672; sce:YGL105W	128027	63689.4	3	3	High	High	1
High	P53252	6	PIL1	0	38.417	27	7	14	339	38.3	4.63	16.38	7	Pf13805	852977	YGR086C	D6VUL8; P53252; sce:YGR086C	126479	58108.5	3	3	High	High	1
High	P40495	7	LYS12	0	27.083	24	7	12	371	40	8.02	8.59	7	Pf00180	854714	YIL094C	D6VVJ3; P40495; sce:YIL094C	121110	68559.5	3	3	High	High	1
High	Q03246	5	MRPS17	0	22.005	25	5	7	237	27.6	9.58	6.5	5	Pf00366	855226	YMR188C	D6W012; Q02523; Q03246; sce:YMR188C	120712	36596.5	3	3	High	High	1
High	P31412	11	VMA5	0	64.836	43	11	27	392	44.2	6.67	17.51	11	Pf03223	853782	YKL080W	D6VXK7; P31412; sce:YKL080W	112349	49872.4	3	3	High	High	1	Met-loss+Acetyl [N-Term]
High	P53256	9	RRP46	0	41.405	62	9	18	223	24.4	4.86	7.92	9	Pf01138, Pf03725	852987	YGR095C	D6VUM7; P53256; Q6TQU1; sce:YGR095C	112053	29562.9	3	3	High	High	1	Met-loss+Acetyl [N-Term]
High	P53303	8	ZPR1	0	36.774	25	8	15	486	55	4.86	3.71	8	Pf03367	853125	YGR211W	D6VUZ4; P53303; Q02807; Q02808; sce:YGR211W	111187	41452.6	3	3	High	High	1
High	Q04119	18	PPN1	0	161.61	40	18	67	674	78.3	6.87	88.02	18	Pf00149	852063	YDR452W	D6VT77; Q04119; sce:YDR452W	107562	39540.4	3	3	High	High	1
High	P25567	6	SRO9	0	32.998	19	6	10	434	48	8.9	4.54	6	Pf05383	850320	YCL037C	D6VQX8; P25567; sce:YCL037C	106918	55445	3	3	High	High	1	Met-loss+Acetyl [N-Term]
High	P21576	14	VPS1	0	59.297	23	14	25	704	78.7	7.91	14.73	14	Pf00350, Pf01031, Pf02212	853870	YKR001C	D6VXT7; P21576; sce:YKR001C	97635	49439.7	3	3	High	High	1
High	Q03940	15	RVB1	0	78.705	48	15	22	463	50.4	5.87	22.64	15	Pf06068, Pf17856	851771	YDR190C	D6VSH3; Q03940; sce:YDR190C	95580	34566.5	3	3	High	High	1
High	Q00764	4	TPS1	0	14.944	11	4	8	495	56.1	6.09	2.09	4	Pf00982	852423	YBR126C	D6VQC3; Q00764; Q01801; Q05168; Q6J5J4; sce:YBR126C	82265.3	50768.4	3	3	High	High	1
High	P38129	5	TAF5	0	15.383	7	5	7	798	88.9	7.4	0	5	Pf00400, Pf04494, Pf08513	852497	YBR198C	D6VQJ4; P38129; sce:YBR198C	71890.4	35045.6	3	3	High	High	1
High	O14467	4	MBF1	0	17.38	26	4	13	151	16.4	10.61	7.83	4	Pf01381, Pf08523	854474	YOR298C-A	D6W2Z8; O14467; Q7LGJ8; Q86ZS7; sce:YOR298C-A	1.75665e+07	1.86684e+07	3	2	High	High	1
High	P06367	9	RPS14A	0	71.846	69	9	73	137	14.5	10.73	109.98	9	Pf00411	850397	YCR031C	D6VR41; P06367; Q96VG9; sce:YCR031C	3.4055e+06	1.08949e+06	3	2	High	High	1	Met-loss+Acetyl [N-Term]
High	Q05022	105	RRP5	0	1015.49	64	106	1068	1729	193	6.19	1603.32	106	Pf00575	855269	YMR229C	D6W054; Q05022; sce:YMR229C	2.65496e+06	1.3114e+06	3	2	High	High	1
High	P26783	12	RPS5	0	99.816	69	12	63	225	25	8.59	101.96	12	Pf00177	853587	YJR123W	D6VWU2; P26783; sce:YJR123W	1.8336e+06	634345	3	2	High	High	1	Met-loss+Acetyl [N-Term]
High	Q03532	36	HAS1	0	397.139	77	36	512	505	56.7	9.33	793.33	36	Pf00270, Pf00271, Pf13959	855335	YMR290C	D6W0B7; Q03532; sce:YMR290C	1.51195e+06	353283	3	2	High	High	1
High	P41058	4	RPS29B	0	19.089	46	4	15	56	6.7	10.01	6.13	4	Pf00253	851498	YDL061C	A2TBP5; D6VRT5; P05761; P41058; sce:YDL061C	1.00742e+06	414723	3	2	High	High	1
High	P10081	21	TIF1; TIF2	0	150.014	72	21	77	395	44.7	5.12	70.98	21	Pf00270, Pf00271	853303; 853933	YJL138C; YKR059W	D6VW46; P10081; sce:YJL138C; sce:YKR059W	848574	320193	3	2	High	High	1	Met-loss+Acetyl [N-Term]
High	P40858	3	MRPL49	0	24.474	27	3	10	161	18.4	10.78	10.43	3	Pf00829	853349	YJL096W	D6VW88; P40858; sce:YJL096W	633644	183640	3	2	High	High	1
High	P32473	9	PDB1	0	50.006	38	9	17	366	40	5.3	17.2	9	Pf02779, Pf02780	852522	YBR221C	D6VQL7; P32473; sce:YBR221C	592738	127699	3	2	High	High	1
High	P53875	6	MRPL19	0	31.513	53	6	23	158	16.7	9.88	8.24	6	Pf00298, Pf03946	855536	YNL185C	D6W102; P53875; sce:YNL185C	578666	225188	3	2	High	High	1
High	Q06214	20	JIP5	0	134.893	51	20	63	492	55.2	5.2	96.37	20		856298	YPR169W	D6W4H0; Q06214; sce:YPR169W	569935	73931.8	3	2	High	High	1
High	Q01855	3	RPS15	0	49.364	40	3	30	142	16	10.7	27.7	3	Pf00203	854117	YOL040C	D6W226; Q01855; sce:YOL040C	465860	148155	3	2	High	High	1
High	Q06287	12	EMG1	0	51.614	56	12	28	252	27.9	8.41	25.18	12	Pf03587	850883	YLR186W	D6VYI9; E9P8U2; Q06287; sce:YLR186W	260530	50968.3	3	2	High	High	1
High	P35996	5	MRPL38	0	20.084	36	5	10	138	14.9	9.82	2.99	5	Pf00238	853684	YKL170W	D6VX30; P35996; P36529; sce:YKL170W	257232	64045.9	3	2	High	High	1
High	P05030	22	PMA1	0	163.978	37	22	69	918	99.6	5.11	76.32	22	Pf00122, Pf00690, Pf00702	852876	YGL008C	D6VUC9; P05030; sce:YGL008C	254355	87852.2	3	2	High	High	1
High	P29311	3	BMH1	0	64.942	52	11	29	267	30.1	4.88	25.21	11	Pf00244	856924	YER177W	D3DM86; P29311; Q06854; sce:YER177W	250650	70468.5	3	2	High	High	1
High	P42945	68	UTP10	0	473.789	48	68	185	1769	200	6.49	221.27	68	Pf08146, Pf12397	853335	YJL109C	D6VW75; P42945; sce:YJL109C	248348	57011.9	3	2	High	High	1	Met-loss+Acetyl [N-Term]
High	Q12460	25	NOP56	0	208.336	65	26	98	504	56.8	8.9	125.94	26	Pf01798, Pf08156	850894	YLR197W	D6VYK0; Q12460; sce:YLR197W	243951	50586.6	3	2	High	High	1
High	P20606	5	SAR1	0	22.414	33	5	10	190	21.4	5.38	12.93	5	Pf00025	855883	YPL218W	D6W3F2; P20606; sce:YPL218W	223264	82216.4	3	2	High	High	1
High	Q07478	15	SUB2	0	83.741	50	15	33	446	50.3	5.52	22.6	15	Pf00270, Pf00271	851475	YDL084W	D6VRR5; Q07478; sce:YDL084W	216430	76150.1	3	2	High	High	1	Met-loss+Acetyl [N-Term]
High	Q03201	5	RSM10	0	23.636	33	5	8	203	23.4	9.28	7.06	5	Pf00338	851611	YDR041W	D6VS29; Q03201; sce:YDR041W	210876	115629	3	2	High	High	1
High	P22336	23	RFA1	0	139.202	47	23	47	621	70.3	6.23	48.39	23	Pf01336, Pf08646, Pf16900	851266	YAR007C	D6VPL9; P22336; P38906; sce:YAR007C	209691	76165.7	3	2	High	High	1	Met-loss+Acetyl [N-Term]
High	P53305	3	RSM27	0	19.127	39	3	7	110	12.4	10.21	4.11	3	Pf08293	853129	YGR215W	D6VUZ8; P53305; sce:YGR215W	197883	32806.8	3	2	High	High	1
High	P21771	5	MRPS28	0	18.581	19	6	24	286	33	9.92	1.69	6	Pf00312	851937	YDR337W	D6VSW9; P21771; sce:YDR337W	191571	46046.6	3	2	High	High	1
High	Q03973	4	HMO1	0	20.032	28	4	9	246	27.5	8.51	7.05	4	Pf00505	851754	YDR174W	D6VSF6; Q03973; sce:YDR174W	186201	66806.9	3	2	High	High	1
High	P32589	11	SSE1	0	48.732	19	11	21	693	77.3	5.22	14.11	11	Pf00012	855998	YPL106C	D6W3R1; P32589; sce:YPL106C	175832	51929.5	3	2	High	High	1
High	Q03976	5	RSM24	0	23.337	16	5	15	319	37.4	9.23	6	5	Pf10213	851755	YDR175C	D6VSF7; Q03976; sce:YDR175C	175492	48581.9	3	2	High	High	1
High	P28817	3	EHD3	0	11.291	6	3	7	500	56.3	8.34	1.61	3	Pf16113	851606	YDR036C	D6VS24; P28817; Q66RH2; sce:YDR036C	170674	40084.4	3	2	High	High	1
High	P46948	6	SKI6	0	26.969	32	6	18	246	27.5	8.32	18.79	6	Pf01138, Pf03725	853109	YGR195W	D6VUX7; P46948; sce:YGR195W	169571	40293.3	3	2	High	High	1
High	Q01852	8	TIM44	0	34.996	22	8	12	431	48.8	9.44	8.36	8	Pf04280	854790	YIL022W	D6VVQ7; Q01852; sce:YIL022W	164867	44494.6	3	2	High	High	1
High	P25555	8	GBP2	0	39.195	26	8	14	427	48.7	6.28	17.64	8	Pf00076	850346	YCL011C	D6VR01; P25555; sce:YCL011C	158208	87398.6	3	2	High	High	1
High	P35207	7	SKI2	0	22.672	6	7	9	1287	146	6.74	2.03	7	Pf00270, Pf00271, Pf08148, Pf17911, Pf21408, Pf21409	851114	YLR398C	D6VZ33; P35207; Q06047; sce:YLR398C	154107	60975	3	2	High	High	1
High	P19097	27	FAS2	0	104.724	19	27	53	1887	206.8	5.44	22.42	27	Pf00109, Pf01648, Pf02801, Pf18314, Pf18325	855845	YPL231W	D6W3D9; P19097; Q12533; sce:YPL231W	132919	47625.7	3	2	High	High	1
High	Q04491	8	SEC13	0	28.669	33	8	14	297	33	5.73	0	8	Pf00400	850905	YLR208W	D6VYK9; Q04491; sce:YLR208W	131720	38853.5	3	2	High	High	1
High	Q05946	22	UTP13	0	125.561	41	22	40	817	91	5.43	23.48	22	Pf00400, Pf08625	850919	YLR222C	D6VYM2; Q05946; sce:YLR222C	131017	44507.5	3	2	High	High	1
High	P40217	9	TIF34	0	43.198	41	9	16	347	38.7	5.67	10.94	9	Pf00400	855177	YMR146C	D6VZW8; P40217; sce:YMR146C	127386	40677.6	3	2	High	High	1
High	Q02754	3	YPL067C	0	12.37	17	3	5	198	22.8	7.33	1.91	3	Pf12239	856038	YPL067C	D6W3U8; Q02754; Q6Q586; sce:YPL067C	123863	54561.5	3	2	High	High	1
High	Q12122	8	LYS21	0	30.897	22	8	11	440	48.6	6.3	4.44	8	Pf00682	851425	YDL131W	D6VRL8; E9P8Z7; Q12122; sce:YDL131W	123704	37007.8	3	2	High	High	1
High	P31539	9	HSP104	0	37.11	11	9	13	908	102	5.45	4.22	9	Pf00004, Pf02861, Pf07724, Pf10431, Pf17871	850633	YLL026W	D6VXX8; P31539; sce:YLL026W	113397	42315.2	3	2	High	High	1
High	P27929	3	NAM9	0	9.616	7	3	8	486	56.3	9.64	3.86	3	Pf01479	855585	YNL137C	D6W145; P27929; sce:YNL137C	107717	23379.4	3	2	High	High	1
High	P25294	6	SIS1	0	21.53	25	6	12	352	37.6	9.03	3.77	6	Pf00226, Pf01556	855725	YNL007C	D6W1H0; P25294; sce:YNL007C	101048	32482.3	3	2	High	High	1
High	P32419	13	MDH3	0	77.842	59	13	38	343	37.2	9.2	20.41	13	Pf00056, Pf02866	851481	YDL078C	D6VRS1; P32419; Q12689; sce:YDL078C	101016	36317.6	3	2	High	High	1
High	Q06685	31	VIP1	0	153.582	39	31	55	1146	129.7	8.65	53.06	31	Pf00328, Pf08443, Pf18086	851126	YLR410W	D6VZ44; Q06685; sce:YLR410W	100517	34634	3	2	High	High	1
High	P04385	9	GAL1	0	37.685	25	9	13	528	57.9	6.73	7.15	9	Pf00288, Pf08544, Pf10509	852308	YBR020W	D6VQ22; P04385; sce:YBR020W	93329.5	31919	3	2	High	High	1

## Sheet: 2_AF and r-proteins (filtered)
After step 1) filtered proteins: For assigned assembly factors and r-proteins the relative abundance (to the bait Noc2) was calculated for both replicates and mean and standard deviation (red if >10% ) was calculated
Protein FDR Confidence: Combined	Accession	# Unique Peptides	Gene Symbol	Exp. q-value: Combined	Sum PEP Score	Coverage [%]	# Peptides	# PSMs	# AAs	MW [kDa]	calc. pI	Score Sequest HT: Sequest HT	# Peptides (by Search Engine): Sequest HT	Pfam IDs	Entrez Gene ID	Ensembl Gene ID	Gene ID	Abundance: replicate 1 (LiCl treatment)	Abundance: replicate 2 (LiCl treatment)	Abundances Count: replicate 1 (LiCl treatment)	Abundances Count: replicate 2 (LiCl treatment)	Found in Sample: replicate 1 (LiCl treatment)	Found in Sample: replicate 2 (LiCl treatment)	# Protein Groups	Modifications	relative abundance: replicate 1 (LiCl treatment)	relative abundance: replicate 2 (LiCl treatment)	mean relative abundance [%]	standard deviation relative abundance [%]
High	P40212	9	RPL13B	0	101.284	52	9	190	199	22.5	11.08	274.72	9	Pf01294	855173	YMR142C	D6VZW4; P40212; sce:YMR142C	1.2719e+07	4.33066e+06	3	3	High	High	1		1.30712	0.868788	108.795	21.9164
High	P40525	4	RPL34B	0	39.059	32	4	106	121	13.6	10.83	149.83	4	Pf01199	854759	YIL052C	D6VVM9; P40525; sce:YIL052C	1.03727e+07	4.99078e+06	3	3	High	High	1		1.06599	1.00122	103.36	3.23877
High	P39744	41	NOC2	0	389.2	59	41	824	710	81.6	8.48	994.31	41	Pf03715	854381	YOR206W	D6W2R2; P39744; Q08625; sce:YOR206W	9.73059e+06	4.98472e+06	3	3	High	High	1		1	1	100	0
High	P0CX43	12	RPL1A	0	124.126	54	12	235	217	24.5	9.72	362.62	12	Pf00687	852742; 855881	YGL135W; YPL220W	D6VU14; P0CX43; P53030; sce:YGL135W; sce:YPL220W	8.02149e+06	4.19177e+06	3	3	High	High	1		0.824359	0.840924	83.2641	0.828246
High	P0CX53	9	RPL12A	0	119.521	63	9	145	165	17.8	9.41	305.54	9	Pf00298, Pf03946	852026; 856656	YDR418W; YEL054C	D3DLJ6; P05741; P0CX53; P17079; sce:YDR418W; sce:YEL054C	8090119	3.72327e+06	3	3	High	High	1		0.831411	0.746938	78.9174	4.22368
High	P04456	8	RPL25	0	123.409	52	8	235	142	15.7	10.11	364.67	8	Pf00276, Pf03939	853993	YOL127W	D6W1U1; P04456; sce:YOL127W	8.12396e+06	3.4214e+06	3	3	High	High	1		0.834889	0.686377	76.0633	7.42557
High	P0CX85	8	RPL35B	0	72.045	46	8	89	120	13.9	10.58	122.23	8	Pf00831	851336; 851419	YDL136W; YDL191W	D6VRG2; P0CX85; P39741; P39930; sce:YDL136W; sce:YDL191W	8212914	2.99182e+06	3	3	High	High	1		0.844031	0.600198	72.2114	12.1916
High	Q3E757	10	RPL11B	0	83.214	61	10	150	174	19.7	9.92	246.75	10	Pf00281, Pf00673	852976	YGR085C	D6VUL7; P06380; Q3E757; sce:YGR085C	7.05399e+06	3.27628e+06	3	3	High	High	1		0.72493	0.657264	69.1097	3.38328
High	P43586	10	LOC1	0	99.53	35	10	181	204	23.6	10.32	259.8	10		850551	YFR001W	D6VTN1; P43586; sce:YFR001W	8.6569e+06	2.13493e+06	3	3	High	High	1		0.889659	0.428294	65.8976	23.0682
High	P07280	7	RPS19A	0	53.684	57	7	56	144	15.9	9.61	83.19	7	Pf01090	854028	YOL121C	D6W1U7; P07280; sce:YOL121C	5.672e+06	3.29358e+06	3	3	High	High	1		0.582905	0.660736	62.182	3.89157
High	P38061	8	RPL32	0	57.056	51	8	131	130	14.8	11.17	139.44	8	Pf01655	852185	YBL092W	A2TBM1; D6VPR1; P38061; sce:YBL092W	7.19694e+06	2.34227e+06	3	3	High	High	1	Met-loss+Acetyl [N-Term]	0.73962	0.469891	60.4755	13.4864
High	P26321	13	RPL5	0	243.745	68	14	264	297	33.7	6.83	426.8	14	Pf14204, Pf17144	855972	YPL131W	D6W3N6; P26321; sce:YPL131W	6.60222e+06	2.52918e+06	3	3	High	High	1		0.678501	0.507386	59.2944	8.55576
High	P0CX48	8	RPS11B	0	54.706	54	8	44	156	17.7	10.78	50.68	8	Pf00366, Pf16205	851589; 852337	YBR048W; YDR025W	D6VQ48; O11852; P0CX48; P26781; sce:YBR048W; sce:YDR025W	6.1187e+06	2.6523e+06	3	3	High	High	1	Met-loss+Acetyl [N-Term]	0.628811	0.532085	58.0448	4.8363
High	Q12176	47	MAK21	0	583.362	60	47	603	1025	116.6	5.02	960.67	47	Pf03914	851632	YDR060W	D6VS46; Q12176; sce:YDR060W	5.34933e+06	2.60086e+06	3	3	High	High	1	Met-loss+Acetyl [N-Term]	0.549743	0.521766	53.5755	1.39885
High	P0CX49	14	RPL18A	0	88.888	54	14	258	186	20.6	11.71	366.42	14	Pf17135	854029; 855415	YNL301C; YOL120C	D6W0P3; P07279; P0CX49; sce:YNL301C; sce:YOL120C	6.14064e+06	2.17491e+06	3	3	High	High	1		0.631066	0.436316	53.3691	9.73748
High	Q07896	32	NOC3	0	500.421	61	33	568	663	75.5	5.95	880	33	Pf03914, Pf07540	850688	YLR002C	D6VY04; Q07896; Q92280; sce:YLR002C	4.99929e+06	2.65485e+06	3	3	High	High	1		0.513771	0.532598	52.3185	0.941358
High	Q08746	8	RRS1	0	157.506	59	8	146	203	22.9	9.47	243.01	8	Pf04939	854469	YOR294W	D6W2Z3; Q08746; sce:YOR294W	5.2396e+06	2.27364e+06	3	3	High	High	1		0.538467	0.456121	49.7294	4.11726
High	P0C2H6	7	RPL27A	0	86.576	54	7	158	136	15.5	10.36	224.69	7	Pf01777	856401	YHR010W	D3DKV5; P0C2H6; P38706; sce:YHR010W	4.74179e+06	1.88613e+06	3	3	High	High	1		0.487308	0.378382	43.2845	5.44629
High	P36049	24	EBP2	0	265.312	51	24	301	427	49.7	6.42	544.5	24	Pf05890	853682	YKL172W	D6VX28; P36049; sce:YKL172W	5.02591e+06	1.51589e+06	3	3	High	High	1		0.516506	0.304108	41.0307	10.6199
High	P0CX83	6	RPL19B	0	73.304	33	6	115	189	21.7	11.36	166.38	6	Pf01280	852254; 852379	YBL027W; YBR084C-A	D6VPX3; P05735; P0CX83; sce:YBL027W; sce:YBR084C-A	4.81246e+06	1.55886e+06	3	3	High	High	1		0.49457	0.312729	40.365	9.09209
High	Q3E7Y3	9	RPS22B	0	95.206	74	9	110	130	14.6	9.94	199.7	9	Pf00410	851082	YLR367W	D6VZ04; P04648; Q3E7Y3; sce:YLR367W	3.97588e+06	1.88908e+06	3	3	High	High	1		0.408596	0.378974	39.3785	1.4811
High	P40991	35	NOP2	0	495.214	64	35	502	618	69.8	5.05	818.01	35	Pf01189, Pf17125	855664	YNL061W	D6W1B9; E9P914; P40991; sce:YNL061W	4.89219e+06	1.35989e+06	3	3	High	High	1		0.502764	0.272812	38.7788	11.4976
High	P33201	14	MRT4	0	171.57	68	14	229	236	27	8.56	380.74	14	Pf00466, Pf17777	853860	YKL009W	D6VXS7; P33201; sce:YKL009W	4.43396e+06	1.41151e+06	3	3	High	High	1		0.455672	0.283168	36.942	8.62519
High	P14126	25	RPL3	0	340.968	65	25	713	387	43.7	10.29	1137.32	25	Pf00297	854229	YOR063W	D6W2C6; P14126; Q08459; sce:YOR063W	4.49662e+06	1.31713e+06	3	3	High	High	1		0.462112	0.264234	36.3173	9.89392
High	P0CX40	7	RPS8B	0	69.656	49	7	49	200	22.5	10.67	70.12	7	Pf01201	852206; 856839	YBL072C; YER102W	A2TBM0; A2TBP0; D3DM09; P05754; P0CX40; P22801; sce:YBL072C; sce:YER102W	3.71581e+06	1.67258e+06	3	3	High	High	1		0.381869	0.335543	35.8706	2.31632
High	P48589	5	RPS12	0	39.91	50	5	40	143	15.5	4.73	56.74	5	Pf01248	854551	YOR369C	D6W362; P48589; Q02545; sce:YOR369C	4.08306e+06	1.44013e+06	3	3	High	High	1	Met-loss+Acetyl [N-Term]	0.419611	0.288909	35.426	6.53511
High	P0CX24	11	RPL20B	0	104.02	55	11	145	172	20.4	10.3	191.69	11	Pf01775	854489; 855283		A1YV95; A1YV96; D6W068; P0C2I0; P0C2I1; P0CX24; P47913; sce:YMR242C; sce:YOR312C	4.16162e+06	1.38752e+06	3	3	High	High	1		0.427684	0.278354	35.3019	7.46649
High	P0CX46	8	RPL2B	0	71.622	33	8	83	254	27.4	11.11	129.11	8	Pf00181, Pf03947	850590; 854794	YFR031C-A; YIL018W	D6VTR2; P05736; P0CX46; sce:YFR031C-A; sce:YIL018W	3.89573e+06	1.44622e+06	3	3	High	High	1		0.400359	0.290131	34.5245	5.51142
High	Q08235	16	BRX1	0	263.77	68	16	250	291	33.5	9.29	394.49	16	Pf04427	854078	YOL077C	D6W1Z1; Q08235; sce:YOL077C	3.90702e+06	1.42697e+06	3	3	High	High	1		0.401519	0.286269	34.3894	5.76253
High	P26786	6	RPS7A	0	74.263	67	11	111	190	21.6	9.83	112.78	11	Pf01251	854263	YOR096W	D6W2F7; P26786; Q08502; sce:YOR096W	3.12657e+06	1.68897e+06	3	3	High	High	1		0.321314	0.338829	33.0071	0.875753
High	P0CX30	4	RPS23B	0	63.575	39	4	33	145	16	10.73	44.72	4	Pf00164	853015; 856250	YGR118W; YPR132W	D6VUP9; P0CX30; P32827; sce:YGR118W; sce:YPR132W	3.24421e+06	1.54323e+06	3	3	High	High	1		0.333403	0.309592	32.1498	1.19052
High	P36160	15	RPF2	0	281.007	48	15	429	344	39.6	9	654.55	15	Pf04427	853956	YKR081C	D6VXE1; P36160; sce:YKR081C	3.70574e+06	1.23418e+06	3	3	High	High	1		0.380834	0.247592	31.4213	6.66208
High	P05319	5	RPP2A	0	51.989	79	5	40	106	10.7	4.04	53.36	5	Pf00428	854118	YOL039W	D6W227; P05319; sce:YOL039W	3.30861e+06	1.409e+06	3	3	High	High	1		0.340022	0.282665	31.1343	2.86786
High	P0CX38	11	RPS6B	0	101.889	44	11	77	236	27	10.45	118.9	11	Pf01092	852479; 856015	YBR181C; YPL090C	D6VQH5; P02365; P05751; P0CX38; Q02894; sce:YBR181C; sce:YPL090C	3.27749e+06	1.35888e+06	3	3	High	High	1		0.336824	0.272609	30.4716	3.21073
High	P06367	9	RPS14A	0	71.846	69	9	73	137	14.5	10.73	109.98	9	Pf00411	850397	YCR031C	D6VR41; P06367; Q96VG9; sce:YCR031C	3.4055e+06	1.08949e+06	3	2	High	High	1	Met-loss+Acetyl [N-Term]	0.349979	0.218566	28.4273	6.57065
High	P02400	7	RPP2B	0	78.728	82	7	47	110	11	4.15	66.45	7	Pf00428	851990	YDR382W	D6VT16; P02400; sce:YDR382W	2.69157e+06	1.4097e+06	3	3	High	High	1		0.276609	0.282804	27.9706	0.309757
High	P10080	12	SBP1	0	133.431	62	12	88	294	33	5.66	124.64	12	Pf00076	856351	YHL034C	D3DKT4; P10080; sce:YHL034C	2.69329e+06	1.38571e+06	3	3	High	High	1	Met-loss+Acetyl [N-Term]	0.276786	0.277991	27.7389	0.060233
High	Q08962	12	NIP7	0	135.377	80	12	146	181	20.4	9.26	194.1	12	Pf03657, Pf17833	855890	YPL211W	D6W3F9; Q08962; sce:YPL211W	3.36602e+06	1.01715e+06	3	3	High	High	1		0.345922	0.204054	27.4988	7.09339
High	P0CX31	7	RPS24A	0	48.237	47	7	74	135	15.3	10.51	106.08	7	Pf01282	854741; 856805	YER074W; YIL069C	D3DLX9; P0CX31; P26782; sce:YER074W; sce:YIL069C	2.94151e+06	1.21627e+06	3	3	High	High	1	Met-loss+Acetyl [N-Term]	0.302295	0.244	27.3147	2.91476
High	P05739	4	RPL6B	0	104.422	66	14	195	176	20	10.08	277.58	14	Pf01159	851169	YLR448W	D6VZ82; P05739; sce:YLR448W	2.90861e+06	1.22366e+06	3	3	High	High	1		0.298914	0.245481	27.2198	2.67165
High	P38701	6	RPS20	0	33.833	50	6	36	121	13.9	9.52	39.57	6	Pf00338	856371	YHL015W	D3DKP7; P38701; sce:YHL015W	2.61972e+06	1.36707e+06	3	3	High	High	1		0.269226	0.274253	27.1739	0.251344
High	P29453	5	RPL8B	0	224.373	67	19	312	256	28.1	10.02	527.88	19	Pf01248	850682	YLL045C	D6VXW2; P29453; sce:YLL045C	2.65445e+06	1.33838e+06	3	3	High	High	1		0.272794	0.268498	27.0646	0.214833
High	Q05022	105	RRP5	0	1015.49	64	106	1068	1729	193	6.19	1603.32	106	Pf00575	855269	YMR229C	D6W054; Q05022; sce:YMR229C	2.65496e+06	1.3114e+06	3	2	High	High	1		0.272847	0.263085	26.7966	0.488137
High	P05317	11	RPP0	0	78.991	39	11	95	312	33.7	4.83	147.16	11	Pf00428, Pf00466, Pf17777	851052	YLR340W	D6VYX8; P05317; sce:YLR340W	2.50326e+06	1.3223e+06	3	3	High	High	1		0.257257	0.265271	26.1264	0.400692
High	Q08208	30	NOP12	0	290.801	65	30	264	459	51.9	9.44	427.18	30	Pf00076	854116	YOL041C	D6W225; Q08208; sce:YOL041C	2.99227e+06	1.05783e+06	3	3	High	High	1	Met-loss+Acetyl [N-Term]	0.307512	0.212214	25.9863	4.76489
High	Q12522	9	TIF6	0	180.725	68	9	84	245	26.4	4.64	154.66	9	Pf01912	856126	YPR016C	D6W426; Q12522; sce:YPR016C	3.45364e+06	757356	3	3	High	High	1		0.354926	0.151936	25.3431	10.1495
High	P46784	3	RPS10B	0	44.183	38	3	34	105	12.7	9.07	47.91	3	Pf03501	855270	YMR230W	D6W055; P46784; sce:YMR230W	2.21911e+06	1.35694e+06	3	3	High	High	1		0.228055	0.27222	25.0138	2.20821
High	P38112	33	MAK5	0	326.513	56	33	168	773	87	8.4	255.54	33	Pf00270, Pf00271	852439	YBR142W	D6VQD8; P38112; sce:YBR142W	2.94824e+06	980173	3	3	High	High	1		0.302987	0.196636	24.9811	5.31755
High	P14120	6	RPL30	0	72.178	63	6	79	105	11.4	9.8	111.26	6	Pf01248	852853	YGL030W	D6VUA8; P14120; sce:YGL030W	2.44388e+06	1.21156e+06	3	3	High	High	1		0.251155	0.243055	24.7105	0.405009
High	P02406	8	RPL28	0	68.938	43	8	85	149	16.7	10.62	106.61	8	Pf00828	852775	YGL103W	D6VU43; P02406; sce:YGL103W	2.82656e+06	958035	3	3	High	High	1		0.290481	0.192194	24.1338	4.91436
High	Q07915	5	RLP24	0	55.947	30	5	82	199	24	9.57	133.27	5	Pf01246	850695	YLR009W	D6VY11; Q07915; sce:YLR009W	3.12467e+06	622501	3	3	High	High	1		0.321118	0.124882	22.3	9.81181
High	P14127	8	RPS17B	0	59.29	54	8	35	136	15.8	10.51	36.06	8	Pf00833	852058	YDR447C	D6VT72; P14127; sce:YDR447C	2.28756e+06	960786	3	3	High	High	1		0.235089	0.192746	21.3918	2.11715
High	P05318	4	RPP1A	0	58.959	82	4	22	106	10.9	3.88	46.63	4	Pf00428	851478	YDL081C	D6VRR8; P05318; sce:YDL081C	1.94722e+06	1.01282e+06	3	3	High	High	1	Met-loss+Acetyl [N-Term]	0.200113	0.203185	20.1649	0.153595
High	P0C2H8	4	RPL31A	0	44.881	39	4	36	113	12.9	9.99	40.96	4	Pf01198	851484	YDL075W	D6VRS4; P04649; P0C2H8; Q3E7B8; sce:YDL075W	2.35765e+06	787337	3	3	High	High	1		0.242293	0.15795	20.0122	4.21714
High	P25443	12	RPS2	0	99.292	59	12	72	254	27.4	10.43	79.83	12	Pf00333, Pf03719	852754	YGL123W	D6VU25; P25443; sce:YGL123W	1.71947e+06	1.02736e+06	3	3	High	High	1	Met-loss+Acetyl [N-Term]	0.176708	0.206102	19.1405	1.4697
High	Q02326	4	RPL6A	0	105.86	66	14	180	176	19.9	10.1	242.92	14	Pf01159	854902	YML073C	D6VZA0; Q02326; sce:YML073C	1.91367e+06	815667	3	3	High	High	1		0.196665	0.163634	18.0149	1.65159
High	P49166	4	RPL37A	0	26.495	42	5	54	88	9.8	11.63	41.15	5	Pf01907	850882	YLR185W	D6VYI8; P49166; sce:YLR185W	1.85918e+06	823661	3	3	High	High	1		0.191066	0.165237	17.8152	1.29143
High	P53883	24	NOP13	0	149.321	58	24	115	403	45.6	9.29	124.9	24	Pf00076	855547	YNL175C	D6W110; P53883; sce:YNL175C	1.78666e+06	857409	3	3	High	High	1		0.183613	0.172007	17.781	0.580289
High	P41057	3	RPS29A	0	17.42	45	3	17	56	6.7	10.27	26.68	3	Pf00253	851104	YLR388W	A2TBM8; D6VZ23; P05761; P41057; sce:YLR388W	1.59652e+06	827478	3	3	High	High	1		0.164072	0.166003	16.5037	0.0965419
High	P0CX52	9	RPS16B	0	55.868	64	9	67	143	15.8	10.26	55.52	9	Pf00380	851476; 855174	YDL083C; YMR143W	D6VRR6; P0CX52; P26787; P40213; sce:YDL083C; sce:YMR143W	1.84314e+06	683639	3	3	High	High	1	Met-loss+Acetyl [N-Term]	0.189417	0.137147	16.3282	2.61351
High	P53261	37	NOP7	0	376.511	59	37	368	605	69.8	5.6	564.94	37	Pf06732, Pf16589	852995	YGR103W	D6VUN5; P53261; sce:YGR103W	1.96245e+06	586454	3	3	High	High	1		0.201679	0.11765	15.9664	4.20141
High	P26783	12	RPS5	0	99.816	69	12	63	225	25	8.59	101.96	12	Pf00177	853587	YJR123W	D6VWU2; P26783; sce:YJR123W	1.8336e+06	634345	3	2	High	High	1	Met-loss+Acetyl [N-Term]	0.188437	0.127258	15.7848	3.05895
High	P46654	9	RPS0B	0	82.934	65	9	43	252	27.9	4.75	50.58	9	Pf00318	850737	YLR048W	D6VY50; P46654; sce:YLR048W	1.58109e+06	702381	3	3	High	High	1	Met-loss+Acetyl [N-Term]	0.162487	0.140907	15.1697	1.07899
High	Q04660	44	ERB1	0	637.653	70	44	590	807	91.6	5.17	1052.38	44	Pf00400, Pf08145	855068	YMR049C	D6VZM4; Q04660; sce:YMR049C	2.13086e+06	403236	3	3	High	High	1		0.218986	0.0808945	14.994	6.90455
High	P49167	3	RPL38	0	28.756	41	3	74	78	8.8	10.93	117.8	3	Pf01781	851035	YLR325C	D6VYW7; P49167; sce:YLR325C	1.66169e+06	554597	3	3	High	High	1		0.17077	0.111259	14.1015	2.97553
High	P41805	9	RPL10	0	55.894	46	9	68	221	25.3	10.02	56.57	9	Pf00252	850764	YLR075W	D6VY76; P41805; sce:YLR075W	1.54404e+06	601822	3	3	High	High	1		0.158679	0.120734	13.9706	1.89725
High	P32495	5	NHP2	0	31.66	48	5	29	156	17.1	9.72	50.63	5	Pf01248	851319	YDL208W	D6VRE6; P32495; sce:YDL208W	1.48555e+06	604336	3	3	High	High	1		0.152668	0.121238	13.6953	1.57153
High	P0CX55	10	RPS18A	0	68.491	64	10	42	146	17	10.27	58.06	10	Pf00416	852061; 854982	YDR450W; YML026C	D6VT75; P0CX55; P35271; sce:YDR450W; sce:YML026C	1.44088e+06	627215	3	3	High	High	1	Met-loss+Acetyl [N-Term]	0.148077	0.125828	13.6952	1.11247
High	P48164	6	RPS7B	0	57.435	61	11	72	190	21.6	9.92	65.38	11	Pf01251	855628	YNL096C	D6W184; P48164; sce:YNL096C	1.06214e+06	771481	3	3	High	High	1		0.109154	0.154769	13.1962	2.28075
High	Q12024	25	YTM1	0	387.378	71	25	295	460	51.3	6.96	491.73	25	Pf00400, Pf08154	854446	YOR272W	D6W2X2; Q12024; sce:YOR272W	1.76129e+06	382627	3	3	High	High	1		0.181006	0.0767599	12.8883	5.21229
High	P0CX41	5	RPL23A	0	103.523	43	5	162	137	14.5	10.33	163.83	5	Pf00238	852191; 856853	YBL087C; YER117W	D3DM23; P04451; P0CX41; sce:YBL087C; sce:YER117W	1.73743e+06	360518	3	3	High	High	1		0.178554	0.0723246	12.5439	5.31146
High	P38779	25	CIC1	0	354.542	66	25	266	376	42.5	8.78	462.93	25	Pf00687	856449	YHR052W	D3DL01; P38779; sce:YHR052W	1.57036e+06	432664	3	3	High	High	1		0.161384	0.086798	12.4091	3.72928
High	P05756	7	RPS13	0	39.927	50	7	51	151	17	10.43	65.83	7	Pf00312, Pf08069	851636	YDR064W	D6VS50; P05756; sce:YDR064W	1.36324e+06	517607	3	3	High	High	1		0.140098	0.103839	12.1968	1.81297
High	Q3E7X9	4	RPS28A	0	22.157	52	4	29	67	7.6	10.78	32.46	4	Pf01200	854338	YOR167C	D6W2M5; P02380; Q3E7X9; sce:YOR167C	1.33303e+06	453201	3	3	High	High	1		0.136994	0.0909181	11.3956	2.30377
High	P28007	5	GAR1	0	58.743	36	5	36	205	21.5	11.46	56.84	5	Pf04410	856489	YHR089C	D3DL41; P28007; sce:YHR089C	1.28703e+06	476357	3	3	High	High	1		0.132266	0.0955635	11.3915	1.83512
High	Q03532	36	HAS1	0	397.139	77	36	512	505	56.7	9.33	793.33	36	Pf00270, Pf00271, Pf13959	855335	YMR290C	D6W0B7; Q03532; sce:YMR290C	1.51195e+06	353283	3	2	High	High	1		0.155381	0.0708732	11.3127	4.22541
High	Q12389	54	DBP10	0	689.992	62	54	629	995	112.9	9.14	907.56	54	Pf00270, Pf00271, Pf08147	851530	YDL031W	D6VRW1; Q12389; sce:YDL031W	1.42973e+06	350221	3	3	High	High	1		0.146931	0.070259	10.8595	3.83361
High	P05750	15	RPS3	0	100.25	73	15	80	240	26.5	9.41	98.1	15	Pf00189, Pf07650	855543	YNL178W	D6W107; P05750; sce:YNL178W	1.13486e+06	497359	3	3	High	High	1		0.116628	0.0997768	10.8203	0.842579
High	P36080	13	RRP14	0	108.401	34	13	87	434	50.5	9.57	106.29	13	Pf04935, Pf15459	853780	YKL082C	D6VXK5; P36080; sce:YKL082C	1.30793e+06	398600	3	3	High	High	1	Met-loss+Acetyl [N-Term]	0.134414	0.0799645	10.7189	2.72248
High	Q3E792	3	RPS25A	0	11.335	26	3	15	108	12	10.32	11.33	3	Pf03297	852911	YGR027C	A2TBN4; D6VUG0; P05758; P07282; Q3E792; Q45U56; sce:YGR027C	1.14151e+06	465630	3	3	High	High	1		0.117312	0.0934115	10.5362	1.19501
High	Q04373	31	PUF6	0	287.828	58	31	294	656	75.1	6.89	379.74	31	Pf00806, Pf08144	852107	YDR496C	D6VTB8; Q04373; sce:YDR496C	1.21007e+06	421487	3	3	High	High	1		0.124358	0.0845558	10.4457	1.9901
High	P53254	53	UTP22	0	350.278	58	53	199	1237	140.4	8.46	223.84	53	Pf03813, Pf17403, Pf17404, Pf17405, Pf17406, Pf17407	852982	YGR090W	D6VUM2; P53254; sce:YGR090W	871546	562225	3	3	High	High	1		0.0895677	0.11279	10.1179	1.16111
High	P39939	3	RPS26B	0	12.45	26	3	11	119	13.4	10.9	10.8	3	Pf01283	856868	YER131W	A2TBN5; D3DM37; P39939; Q6B2E8; sce:YER131W	1.11661e+06	387382	3	3	High	High	1		0.114753	0.0777139	9.62333	1.85194
High	P40007	12	NOP16	0	92.846	59	12	64	231	26.9	9.26	97.26	12	Pf09420	856719	YER002W	D3DLP8; P40007; sce:YER002W	1.29163e+06	285265	3	3	High	High	1		0.132739	0.0572279	9.49836	3.77557
High	P33322	19	CBF5	0	197.761	55	19	91	483	54.7	8.9	104.14	19	Pf01472, Pf01509, Pf08068, Pf16198	850872	YLR175W	D6VYH9; P33322; sce:YLR175W	995133	431297	3	3	High	High	1		0.102269	0.0865238	9.43962	0.787236
High	P41058	4	RPS29B	0	19.089	46	4	15	56	6.7	10.01	6.13	4	Pf00253	851498	YDL061C	A2TBP5; D6VRT5; P05761; P41058; sce:YDL061C	1.00742e+06	414723	3	2	High	High	1		0.103531	0.0831989	9.33651	1.01662
High	P0CX35	15	RPS4A	0	62.741	52	15	63	261	29.4	10.08	58.9	15	Pf00467, Pf00900, Pf01479, Pf08071, Pf16121	853610; 856610	YHR203C; YJR145C	D3DLF2; P05753; P0CX35; sce:YHR203C; sce:YJR145C	1.07467e+06	375970	3	3	High	High	1		0.110442	0.0754245	9.29333	1.75089
High	P37838	32	NOP4	0	282.11	49	32	274	685	77.8	9.06	385.34	32	Pf00076	856063	YPL043W	D6W3X0; P37838; sce:YPL043W	1.16826e+06	293334	3	3	High	High	1		0.12006	0.0588466	8.94535	3.06069
High	P53136	29	NSA1	0	339.559	70	29	231	463	51.9	7.84	348.69	29		852767	YGL111W	D6VU36; P53136; sce:YGL111W	1.15279e+06	284130	3	3	High	High	1		0.118471	0.0570002	8.77357	3.07355
High	P40078	14	NSA2	0	159.896	48	14	164	261	29.7	10.24	251.35	14	Pf01201	856863	YER126C	D3DM32; P40078; sce:YER126C	1.07429e+06	210813	3	3	High	High	1	Met-loss+Acetyl [N-Term]	0.110404	0.0422919	7.63477	3.40558
High	P53927	8	NOP15	0	140.194	51	8	122	220	25.4	9.28	177.58	8	Pf00076	855613	YNL110C	D6W171; P53927; sce:YNL110C	1.06073e+06	211614	3	3	High	High	1		0.10901	0.0424526	7.5731	3.32785
High	Q01560	9	NPL3	0	59.447	27	9	30	414	45.4	5.54	22.86	9	Pf00076	852042	YDR432W	D6VT60; Q01560; sce:YDR432W	829746	308559	3	3	High	High	1		0.085272	0.0619011	7.35865	1.16854
High	P26784	8	RPL16A	0	75.184	52	14	111	199	22.2	10.48	124.38	14	Pf00572	854673	YIL133C	D6VVF4; P26784; sce:YIL133C	828788	272693	3	3	High	High	1	Met-loss+Acetyl [N-Term]	0.0851735	0.0547059	6.99397	1.52338
High	Q04305	21	UTP15	0	142.647	62	21	47	513	57.7	9.31	74.42	21	Pf00400, Pf09384	855118	YMR093W	D6VZR6; Q04305; sce:YMR093W	740448	315838	3	3	High	High	1		0.0760949	0.0633612	6.97281	0.636681
High	P21304	24	PWP1	0	164.861	65	24	75	576	63.8	4.61	76.96	24	Pf00400	850893	YLR196W	D6VYJ9; P21304; sce:YLR196W	957924	177048	3	3	High	High	1		0.0984447	0.0355181	6.69814	3.14633
High	P25368	10	RRP7	0	95.88	51	10	33	297	34.4	8.87	45.6	10	Pf12923, Pf17799	850326	YCL031C	D6VQY4; P25368; sce:YCL031C	620129	313426	3	3	High	High	1		0.0637299	0.0628774	6.33036	0.0426249
High	P15646	15	NOP1	0	130.445	51	15	97	327	34.4	10.24	151.18	15	Pf01269	851548	YDL014W	D6VRX5; P15646; P89890; sce:YDL014W	773200	225774	3	3	High	High	1		0.0794607	0.0452932	6.2377	1.70837
High	P25586	12	KRR1	0	43.09	35	12	33	316	37.1	9.39	18.21	12	Pf17903, Pf21800	850298	YCL059C	D6VQV7; P25586; sce:YCL059C	514338	336155	3	3	High	High	1		0.0528579	0.0674371	6.01475	0.728964
High	P38805	20	RPF1	0	165.443	63	20	115	295	35.1	9.47	154.31	20	Pf04427	856488	YHR088W	D3DL40; P38805; sce:YHR088W	780247	159403	3	3	High	High	1		0.080185	0.0319783	5.60816	2.41033
High	P51402	3	RPL37B	0	16.454	39	4	19	88	9.9	11.8	18.42	4	Pf01907	852111	YDR500C	D6VTC2; P51402; sce:YDR500C	547099	199853	3	3	High	High	1		0.0562247	0.0400931	4.81589	0.806576
High	P32892	41	DRS1	0	557.549	60	41	415	752	84.8	5.74	650.81	41	Pf00270, Pf00271	850652	YLL008W	D6VXZ4; P32892; sce:YLL008W	622976	144313	3	3	High	High	1		0.0640225	0.0289512	4.64868	1.75357
High	P0CX26	3	RPL43B	0	29.175	38	3	14	92	10.1	10.42	19.61	3	Pf01780	853557; 856156	YJR094W-A; YPR043W	D6VWR3; P0CX26; P49631; sce:YJR094W-A; sce:YPR043W	591945	158555	3	3	High	High	1		0.0608335	0.0318082	4.63208	1.45127
High	P40693	14	RLP7	0	117.763	47	14	100	322	36.5	9.45	162.1	14	Pf00327	855730	YNL002C	D6W1H5; P40693; sce:YNL002C	597414	153891	3	3	High	High	1		0.0613955	0.0308725	4.6134	1.52615
High	Q01855	3	RPS15	0	49.364	40	3	30	142	16	10.7	27.7	3	Pf00203	854117	YOL040C	D6W226; Q01855; sce:YOL040C	465860	148155	3	2	High	High	1		0.0478758	0.0297219	3.87989	0.907693
High	Q06214	20	JIP5	0	134.893	51	20	63	492	55.2	5.2	96.37	20		856298	YPR169W	D6W4H0; Q06214; sce:YPR169W	569935	73931.8	3	2	High	High	1		0.0585715	0.0148317	3.67016	2.18699
High	Q06511	11	RRP15	0	85.971	43	11	54	250	28.2	5.76	72.51	11	Pf07890	856264	YPR143W	D6W4E0; Q06511; sce:YPR143W	391800	135930	3	3	High	High	1		0.0402648	0.0272694	3.37671	0.649769
High	P38789	4	SSF1	0	241.45	54	18	125	453	51.7	9.26	187.12	18	Pf04427	856463	YHR066W	D3DL15; P38789; sce:YHR066W	410271	114131	3	3	High	High	1		0.042163	0.0228962	3.25296	0.96334
High	Q06679	28	UTP4	0	237.792	49	28	83	776	87.7	6.57	125.75	28	Pf00400	851924	YDR324C	D6VSV7; Q06679; sce:YDR324C	423256	94511.1	3	3	High	High	1		0.0434975	0.0189602	3.12288	1.22686
High	P38882	27	UTP9	0	201.882	64	27	70	575	65.2	4.86	89.45	27		856603	YHR196W	D3DLE4; P38882; sce:YHR196W	355933	104122	3	3	High	High	1		0.0365788	0.0208882	2.87335	0.78453
High	P33750	18	SOF1	0	99.223	45	18	48	489	56.8	9.41	40.73	18	Pf00400, Pf04158	850649	YLL011W	D6VXZ1; P33750; sce:YLL011W	409115	75557	3	3	High	High	1		0.0420443	0.0151577	2.8601	1.34433
High	P53972	30	RCM1	0	330.717	70	30	258	490	56.1	8.73	420.9	30	Pf01189, Pf21153	855709	YNL022C	D6W1F7; P53972; sce:YNL022C	411907	70962.8	3	3	High	High	1		0.0423312	0.0142361	2.82836	1.40475
High	Q12339	10	UTP23	0	54.63	50	10	21	254	28.8	10.04	21.28	10	Pf04900	854165	YOR004W	D6W270; Q12339; sce:YOR004W	199522	115271	3	3	High	High	1		0.0205046	0.0231248	2.18147	0.13101
High	Q12754	48	RRP12	0	356.673	51	48	153	1228	137.4	7.02	173.99	48	Pf08161	856095	YPL012W	D6W400; Q12754; Q7LH12; sce:YPL012W	220155	102037	3	3	High	High	1		0.0226251	0.02047	2.15476	0.107752
High	Q07623	6	NOP6	0	36.68	40	6	18	225	25.2	10.08	13.05	6		851313	YDL213C	D6VRE1; Q07623; sce:YDL213C	200554	97133.3	3	3	High	High	1		0.0206106	0.0194862	2.00484	0.0562214
High	Q06287	12	EMG1	0	51.614	56	12	28	252	27.9	8.41	25.18	12	Pf03587	850883	YLR186W	D6VYI9; E9P8U2; Q06287; sce:YLR186W	260530	50968.3	3	2	High	High	1		0.0267743	0.0102249	1.84996	0.827469
High	P42945	68	UTP10	0	473.789	48	68	185	1769	200	6.49	221.27	68	Pf08146, Pf12397	853335	YJL109C	D6VW75; P42945; sce:YJL109C	248348	57011.9	3	2	High	High	1	Met-loss+Acetyl [N-Term]	0.0255224	0.0114373	1.84799	0.704254
High	Q12460	25	NOP56	0	208.336	65	26	98	504	56.8	8.9	125.94	26	Pf01798, Pf08156	850894	YLR197W	D6VYK0; Q12460; sce:YLR197W	243951	50586.6	3	2	High	High	1		0.0250706	0.0101483	1.76095	0.746112
High	Q08096	12	RCL1	0	56.676	39	12	29	367	40.1	8.84	23.69	12	Pf01137, Pf05189	854152	YOL010W	D6W257; Q08096; sce:YOL010W	179506	74440	3	3	High	High	1		0.0184476	0.0149337	1.66906	0.175697
High	P35194	72	UTP20	0	401.871	37	72	142	2493	287.4	7.03	145.51	72	Pf07539, Pf20416	852282	YBL004W	D6VPZ8; P35194; sce:YBL004W	196846	63927.8	3	3	High	High	1		0.0202296	0.0128248	1.65272	0.370244
High	P47019	5	ALB1	0	23.111	29	5	18	175	19.3	10.02	14.24	5	Pf09135	853320	YJL122W	D6VW64; P47019; sce:YJL122W	149689	50589.8	3	3	High	High	1		0.0153833	0.010149	1.27662	0.261718
High	Q05946	22	UTP13	0	125.561	41	22	40	817	91	5.43	23.48	22	Pf00400, Pf08625	850919	YLR222C	D6VYM2; Q05946; sce:YLR222C	131017	44507.5	3	2	High	High	1		0.0134645	0.00892879	1.11966	0.226783

## Sheet: 3_>0.2ab_<0.1std
After step 2) filtered assembly factors and r-proteins: mean relative abundance (to the bait Noc2) >0.2 and standard deviation <0.1
Gene Symbol	mean relative abundance	standard deviation relative abundance [%]			r-protein	mean relative abundance	standard deviation relative abundance [%]	standard deviation relative abundance	assembly factor	mean relative abundance	standard deviation relative abundance [%]	standard deviation relative abundance
RPL34B	1.0336	3.23877			Rpl31a	0.200122	4.21714	0.0421714	Noc2 (bait)	1	0	0
NOC2	1	0			Rpp1a	0.201649	0.153595	0.00153595	Noc1	0.535755	1.39885	0.0139885
RPL1A	0.832641	0.828246			Rps17b	0.213918	2.11715	0.0211715	Noc3	0.523185	0.941358	0.00941358
RPL12A	0.789174	4.22368			Rpl28	0.241338	4.91436	0.0491436	Rrs1	0.497294	4.11726	0.0411726
RPL25	0.760633	7.42557			Rpl30	0.247105	0.405009	0.00405009	Mrt4	0.36942	8.62519	0.0862519
RPL11B	0.691097	3.38328			Rps10b	0.250138	2.20821	0.0220821	Brx1	0.343894	5.76253	0.0576253
RPS19A	0.62182	3.89157			Rpp0	0.261264	0.400692	0.00400692	Rpf2	0.314213	6.66208	0.0666208
RPL5	0.592944	8.55576			Rpl8b	0.270646	0.214833	0.00214833	Sbp1	0.277389	0.060233	0.00060233
RPS11B	0.580448	4.8363			Rps20	0.271739	0.251344	0.00251344	Nip7	0.274988	7.09339	0.0709339
MAK21	0.535755	1.39885			Rpl6b	0.272198	2.67165	0.0267165	Rrp5*	0.267966	0.488137	0.00488137
RPL18A	0.533691	9.73748			Rps24a	0.273147	2.91476	0.0291476	Nop12	0.259863	4.76489	0.0476489
NOC3	0.523185	0.941358			Rpp2b	0.279706	0.309757	0.00309757	Mak5	0.249811	5.31755	0.0531755
RRS1	0.497294	4.11726			Rps14a*	0.284273	6.57065	0.0657065	Rlp24	0.223	9.81181	0.0981181
RPL27A	0.432845	5.44629			Rps6b	0.304716	3.21073	0.0321073
RPL19B	0.40365	9.09209			Rpp2a	0.311343	2.86786	0.0286786
RPS22B	0.393785	1.4811			Rps23b	0.321498	1.19052	0.0119052
MRT4	0.36942	8.62519			Rps7a	0.330071	0.875753	0.00875753
RPL3	0.363173	9.89392			Rpl2b	0.345245	5.51142	0.0551142
RPS8B	0.358706	2.31632			Rpl20b	0.353019	7.46649	0.0746649
RPS12	0.35426	6.53511			Rps12	0.35426	6.53511	0.0653511
RPL20B	0.353019	7.46649			Rps8b	0.358706	2.31632	0.0231632
RPL2B	0.345245	5.51142			Rpl3	0.363173	9.89392	0.0989392
BRX1	0.343894	5.76253			Rpl19b	0.40365	9.09209	0.0909209
RPS7A	0.330071	0.875753			Rpl27a	0.432845	5.44629	0.0544629
RPS23B	0.321498	1.19052			Rpl18a	0.533691	9.73748	0.0973748
RPF2	0.314213	6.66208			Rps11b	0.580448	4.8363	0.048363
RPP2A	0.311343	2.86786			Rpl5	0.592944	8.55576	0.0855576
RPS6B	0.304716	3.21073			Rps19a	0.62182	3.89157	0.0389157
RPS14A*	0.284273	6.57065			Rpl11b	0.691097	3.38328	0.0338328
RPP2B	0.279706	0.309757			Rpl25	0.760633	7.42557	0.0742557
SBP1	0.277389	0.060233			Rpl12a	0.789174	4.22368	0.0422368
NIP7	0.274988	7.09339			Rpl1a	0.832641	0.828246	0.00828246
RPS24A	0.273147	2.91476			Noc2 (bait)	1	0	0
RPL6B	0.272198	2.67165			Rpl34b	1.0336	3.23877	0.0323877
RPS20	0.271739	0.251344
RPL8B	0.270646	0.214833
RRP5*	0.267966	0.488137
RPP0	0.261264	0.400692
NOP12	0.259863	4.76489
RPS10B	0.250138	2.20821
MAK5	0.249811	5.31755
RPL30	0.247105	0.405009
RPL28	0.241338	4.91436
RLP24	0.223	9.81181
RPS17B	0.213918	2.11715
RPP1A	0.201649	0.153595
RPL31A	0.200122	4.21714
