# Supplementary material
Source: HighWire-hosted journal article supplement (doi:10.1101/rna.079912.123)
Supplement: Supplemental_Material_.docx [file Supplemental_Material_.docx]

**Supplemental material**

**a) title**

The novel pre-rRNA detection workflow “Riboprobing” allows simple identification of undescribed RNA species.

**b) authors**

Magdalena Gerhalter1,Lisa Kofler1, Gertrude Zisser1, Juliane Merl-Pham2, Stefanie Hauck2 and Helmut Bergler1,3

**c) affiliation**

1 Institute of Molecular Biosciences, University of Graz, Graz, 8010, Austria

2 Research Unit Protein Science and Metabolomics and Proteomics Core, Helmholtz Center Munich, Munich, 80939, Germany

3 BioTechMed-Graz, Graz, Austria

Correspondence should be addressed to helmut.bergler@uni-graz.at

**d) shortened title version**

Riboprobing detects novel pre-rRNA

**e) keywords**

ribosome biogenesis, pre-rRNA processing, primer extension, reverse transcription, aberrant pre-rRNA

**Supplemental Tables**

**Supplemental table 1:** *Saccharomyces cerevisiae* strains used in this study.

| **Strain** | **genotype** | **reference or source** |
| --- | --- | --- |
| “JWY8275” P*GAL1*-Rlp7 | *Mat a; ura3; trp1; leu2; his3; lys2; PGAL1-HA-RLP7::TRP* | (Sahasranaman et al. 2011) |
| Noc2-TAP P*GAL1*-Rlp7 | *Mat a; ura3; trp1; leu2; his3; lys2; PGAL1-HA-RLP7::TRP1; NOC2-TAP::HisMX* | This study |
| “LMA158” Nog1-TAP | *Mat a; ura3; trp1; leu2; ade2; arg4; NOG1-TAP::TRP1* | (Saveanu et al. 2003) |
| Noc2-TAP | *Mat a; ura3; leu2; his3; lys2; NOC2-TAP::URA3* | (Ohmayer et al. 2013) |
| Utp14-TAP | *Mat a; ura3; trp1; leu2; his3; Utp14-TAP::HisMX* | This study |
| Tsr1-TAP | *(Mat a; ura3; trp1; leu2; his3; ade2; Tsr1-TAP::* *HisMX)* | Brigitte Pertschy, unpublished |
| W303a | *Mat a; ura; trp1; leu2; his3; ade2* | (Thomas und Rothstein 1989) |

**Supplemental table 2:** Plasmids and Primers used for strain generation.

| **Plasmid** | | **Source** |
| --- | --- | --- |
| Tagging plasmid: pFA6a-TAP-hisMX | | (Janke et al. 2004) |
|  | |  |
| **Name** | **primer – sequence (5`-3`)** | **Purpose** |
| Noc2_F2 | ATTAAACAGTCTGGAAAGTGATGATGACAACGAAGATG TTGAAATGTCAGACGCTCGGATCCCCGGGTTAATTAA | Tagging PCR |
| Noc2_F4 | CATTTATAGACTTAACTATTGAATTCAAGACAAAAAATC AAATCTTGCTGAGTTGGAATTCGAGCTCGTTTAAAC | Tagging PCR |
| Utp14_S2 | GTGGAATGTGCCACATATGCATTTTTTTACCACCAATAAAT ATCAGATCGATGAATTCGAGCTCG | Tagging PCR |
| Utp14_F2 | GACTAAGCCAGGCCAAGTTATTGATCCTTTGAAGGCACCATT TAAGCGGATCCCCGGGTTAATTAA | Tagging PCR |
| Noc2_ctrl | CTTAACAAACGTTTATCAACTG | cPCR Tagging |
| Utp14_ctrl | CGTGTCATTGATGATGAAG | cPCR Tagging |
| TAP-tag_ctrl | cggttggctgctgagacggc | cPCR Tagging |
| All primers listed purchased by Merck / Sigma-Aldrich | | |

**Supplemental table 3**: RNA- and DNA-Oligos used for northern blot and Riboprobing. For the position of the different primers and probes see Supplemental Figure S2.

| **northern blot** | | | |
| --- | --- | --- | --- |
| Name | Sequence (5`-3`) | | Source |
| DA2 | GACTCTCCATCTCTTGTCTTCTTG | | Merck / Sigma Aldrich |
| A2A3 | TGTTACCTCTGGGCCC | | Merck / Sigma Aldrich |
| EC2 | GGCCAGCAATTTCAAGTTA | | Merck / Sigma Aldrich |
| A0A1 | CCAGATAACTATCTTAAAAG | | Merck / Sigma Aldrich |
| 25S | CTCCGCTTATTGATATGC | | Merck / Sigma Aldrich |
| 18S | CATGGCTTAATCTTTGAGAC | | Merck / Sigma Aldrich |
| 5.8S | GCGTTCTTCATCGATGC | | Merck / Sigma Aldrich |
| **Riboprobing 5` Linker** | | | |
| Name | Sequence | Purpose | Source |
| 5` RNA linker | CCCUCCUUGACAGUCUUG*-OH* | RNA-Ligation | Eurofins Genomics |
| 5` linker primer | CCCTCCTTGACAGTCTTG | Fwd. Primer | Merck / Sigma Aldrich |
| C1C2 probe | TAAGAACATTGTTCGCCTAGACGCTC | Rev. Primer | Merck / Sigma Aldrich |
| 18S probe long | CATCTCTTCCAAAGGGTCGAG | Rev. Primer | Merck / Sigma Aldrich |
| **Riboprobing 3` Linker** | | | |
| Name | Sequence | Purpose | Source |
| 3` RNA linker | *PHO*-GUACCCUCUUCUCACGUG-*23ddC* | RNA-Ligation | Eurofins Genomics |
| 3` linker primer | GTACCCTCTTCTCACGTG | Rev. Primer | Merck / Sigma Aldrich |
| 5.8S primer | CTTTCAACAACGGATCTC | Fwd. Primer | Merck / Sigma Aldrich |
| 18S  primer | GTAAGCGCAAGTCATCAGC | Fwd. Primer | Merck / Sigma Aldrich |

**Supplemental table 4**: Antibodies used in this study; all primary antibodies are rabbit antibodies.

| **Primary antibody** | | |
| --- | --- | --- |
| Name | Dilution | Origin |
| α-Cbp | 1:5.000 | *Merck / Sigma - Aldrich* |
| α-Ebp2 | 1:5.000 | M.A. McAlear |
| α-Mak11 | 1:5.000 | M. Fromont-Racine |
| α-Nob1 | 1:5.000 | D. Tollervey |
| α-Noc1 | 1:5.000 | P. Milkereit |
| α-Noc3 | 1:5.000 | P. Milkereit |
| α-Nog1 | 1:5.000 | M. Fromont-Racine |
| α-Nsa2 | 1:5.000 | M. Fromont-Racine |
| α-Rpa135 | 1:3.000 | M. Oaks |
| α-Rpl16 | 1:40.000 | S. Rospert |
| α-Rps3 | 1:50.000 | M. Seedorf |
| α-Sof1 | 1:300 | E. Hurt |
| α-Ytm1 (Nop7) | 1:5.000 | J. d. l. Cruz |
| **Secondary antibody / conjugated antibody** | | |
| Name | Dilution | Origin |
| α-rabbit | 1:15.000 | *Merck / Sigma - Aldrich* |
| α-HA | 1:5.000 | *Roche* |

**Supplemental table 5:** Detailed protocols for the three steps of the Riboprobing workflow: ligation, cDNA synthesis and PCR with the cDNA.

| **volume**  **[µL]** | **component** | **supplier** | **reaction time & temperature** |
| --- | --- | --- | --- |
| **ligation** | | | |
| 2 | 10x T4 RNA Ligase Reaction Buffer | NEB | 2 h 25°C |
| 10.5 | PEG 8000 | NEB |
| 1 | T4 RNA Ligase [10 U/μL] | NEB |
| 2 | ATP [10 mM] | NEB |
| 0.5 | RiboLock [40 U/μL] | Thermo Fischer |
| 2 | RNA-Linker [2 μM] | Eurofins |
| 2 | RNA sample | n.d. |
| **cDNA synthesis** | | | |
| 1 | Primer [2 μM] | Merck / Sigma - Aldrich | 5 min 65°C |
| 1 | dNTPs [10 mM] | Thermo Fischer |
| 18 | Linker-RNA sample from Ligation |  |
| Then incubate 2 minutes on ice before adding the below listed components | | | |
| 4 | 5x First-Strand Buffer | Thermo Fischer | 60 min 55 °C  15 min 70°C |
| 1 | DTT [0,1 M] | Thermo Fischer |
| 1 | RNaseOUT™ Recombinant RNase Inhibitor [40 U/μL] | Thermo Fischer |
| 1 | SuperScript™ III RT [200 U/μL] | Thermo Fischer |
| **PCR reaction** | | | |
| 1.5 | MgCl2 [50 mM] | Thermo Fischer | 2 min 94°C  15s 95°C  1min 55°C 35x  4min 72°C  10 min 72°C |
| 1 | dNTPs [10 mM] | Thermo Fischer |
| 1 | Primer fwd. [10 μM] | Merck / Sigma - Aldrich |
| 1 | Primer rev. [10 μM] | Merck / Sigma - Aldrich |
| 38 | ddH2O | Fresenius |
| 5 | 10x PCR Buffer | Thermo Fischer |
| 0.4 | Taq DNA polymerase [5 U/μL] | Thermo Fischer |
| 2 | cDNA from reverse transcription | n.d. |

**Supplemental Figures**

**
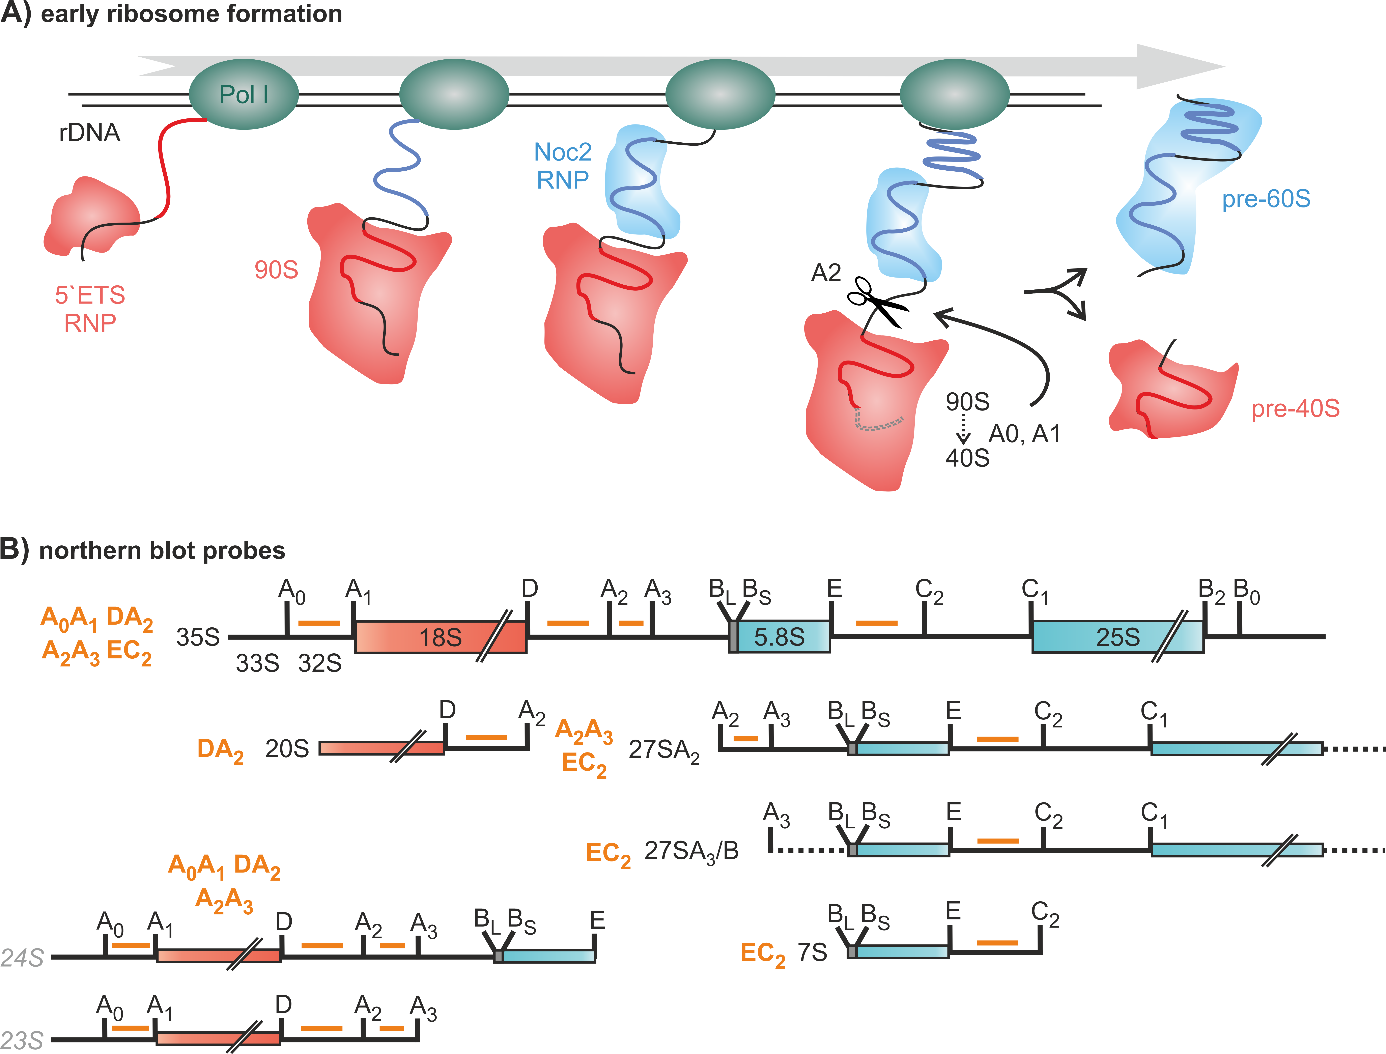
**

**Supplemental Figure S1: A)** Scheme of the very early, co-transcriptional steps in ribosome formation. First, assembly factors bind to the 5` end of the emerging 35S pre-rRNA forming a 5`ETS ribonucleoprotein particle (RNP) joined by dozens of assembly factors and r-proteins to form the 90S pre-ribosomal particle (90S). Around the 5.8S pre-rRNA a few pre-60S specific factors bind to form a co-transcriptional Noc2 RNP. After cleavage at site A0 and A1 (removing the 5`ETS), cleavage at site A2 separates the pathways of the two pre-mature subunits (pre-40S and pre-60S). **B)** Overview how different pre-rRNA species can be detected using different probes (orange) for northern blotting. In grey & italics two aberrant pre-rRNAs are shown (see Supplemental Figure S7B).


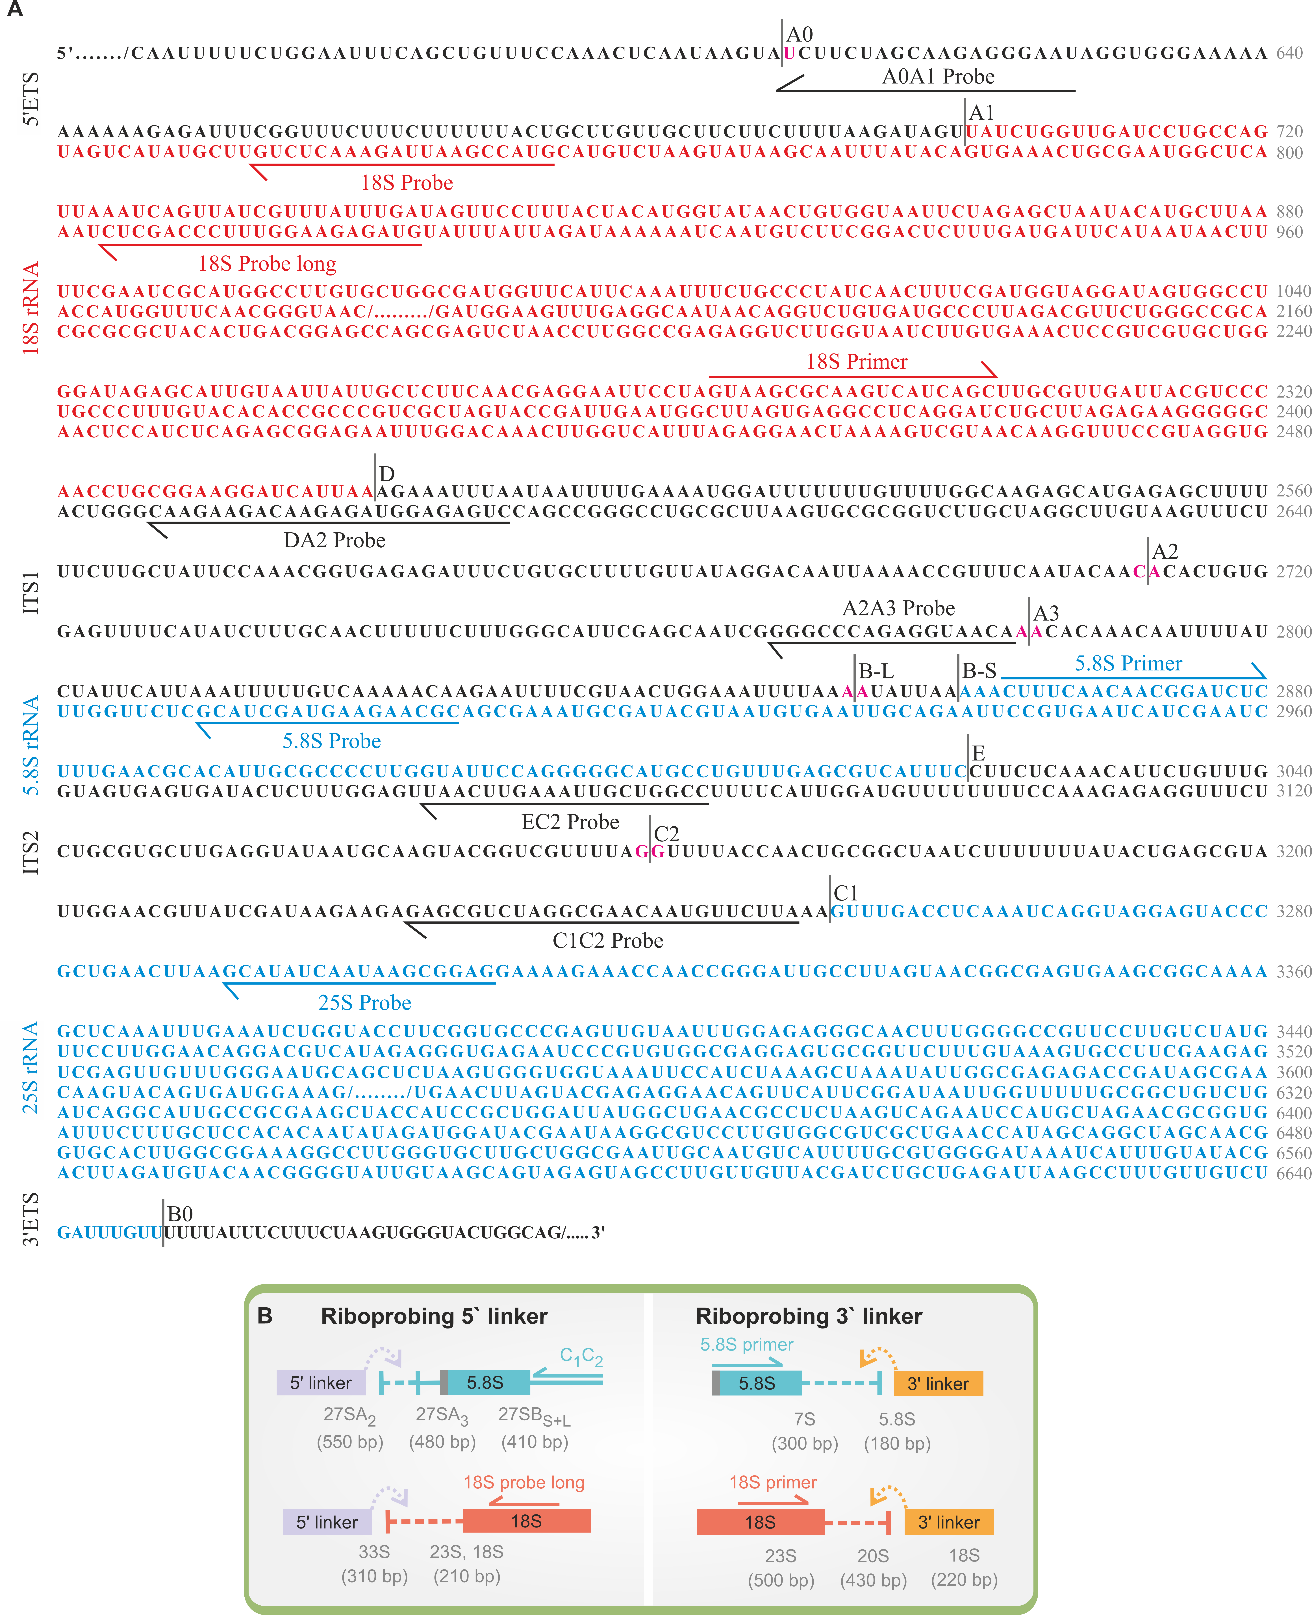


**Supplemental Figure S2: A)** Sequence of the 35S pre-rRNA of *S. cerevisiae*. The sequence of the mature 18S rRNA is marked in red, the sequence of the mature 5.8S and 25S rRNA in blue. Processing sites are given, as well as the primers and probes used for northern blot and Riboprobing. The length (in nucleotides) of the 35S pre-rRNA is indicated at the right side. **B)** Overview how different pre-rRNA species can be detected using different linkers and primers for Riboprobing, with the resulting length given for each (pre-)rRNA species.

**
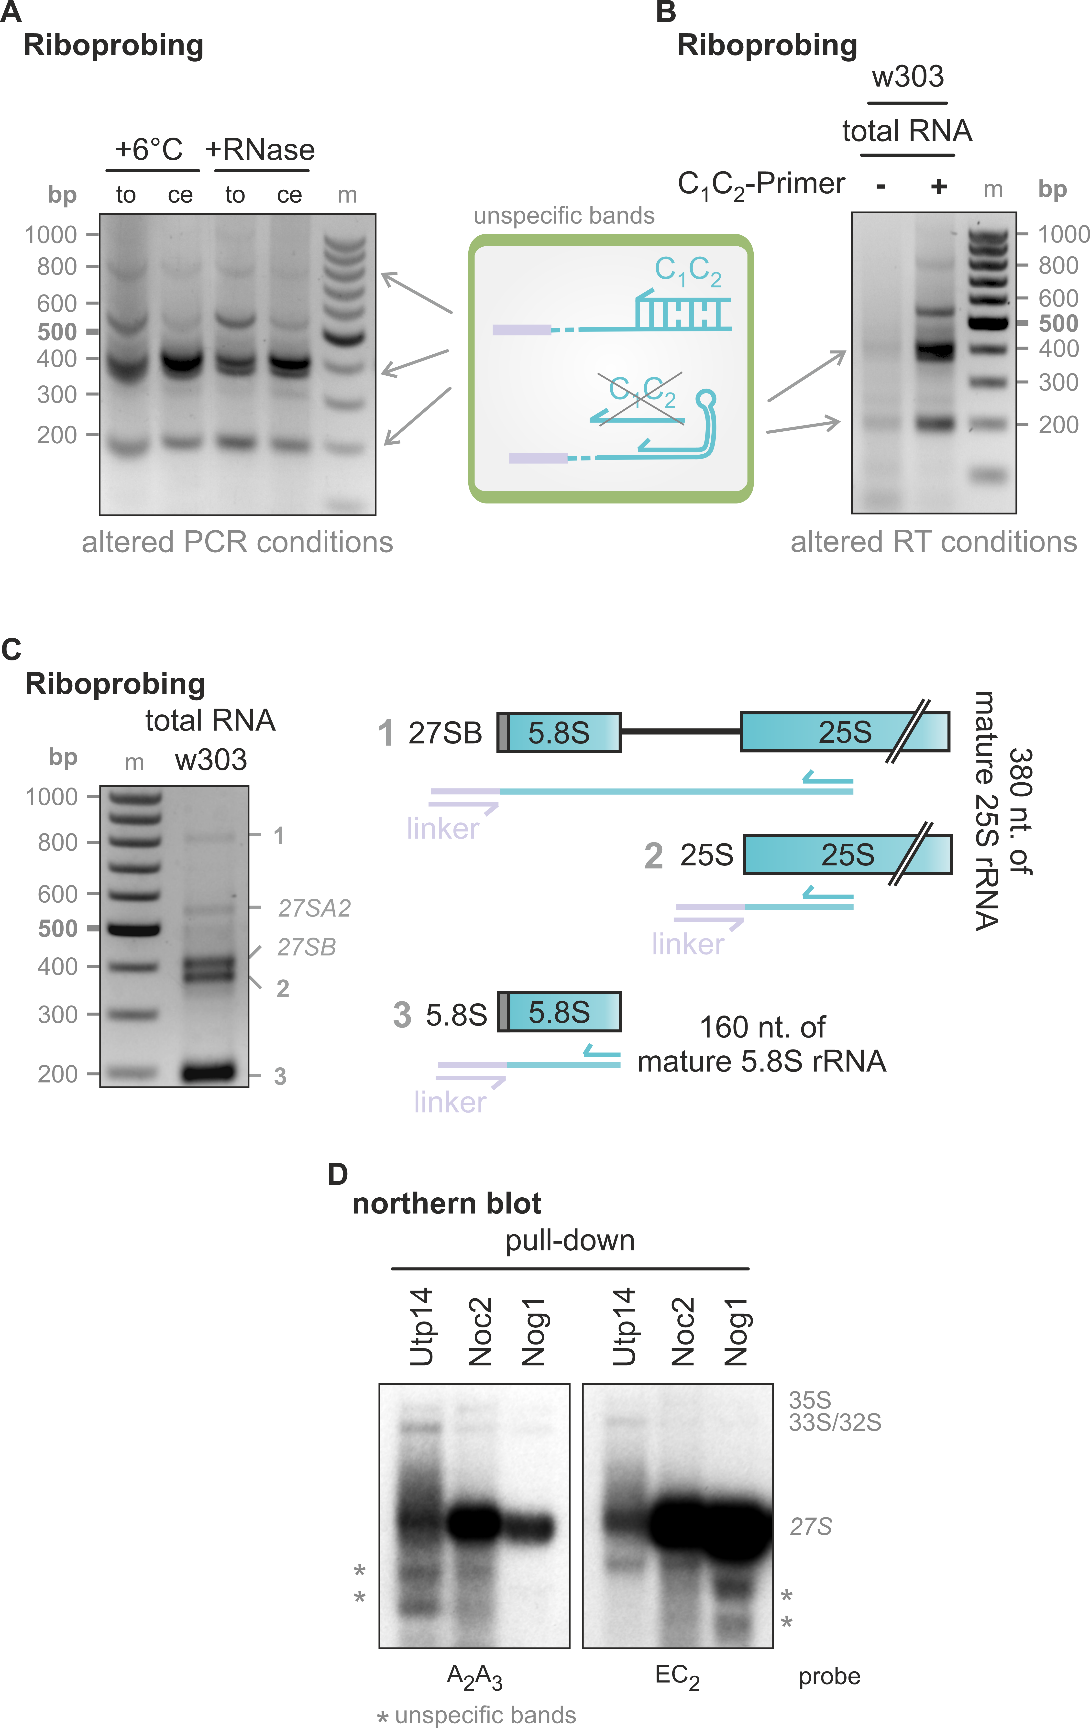
**

**Supplemental Figure S3: A - C)** Products of the Riboprobing reaction separated in an 1.5% agarose gel.m: 100 bp ladder (Thermo Fisher) **A)** Altered PCR conditions: To get rid of unspecific signals in the total RNA (to) and crude extract RNA (ce) derived samples, the annealing temperature during cDNA amplification was increased by 6°C (+6°C) to reduce miss-matched primer annealing. To avoid unspecific bands arising from remaining RNA, samples were treated with RNase A (+RNase) before cDNA amplification. **B)** Unspecific bands were detected even if no C1C2 primer was added to the reverse transcription reaction (5` linker primer and C1C2 primer were present during PCR amplification). **C)** When Riboprobing was performed with C1C2 primer and 5` linker primer, unspecific bands (1-3) arose from total RNA samples due to unspecific binding of C1C2 primer to mature rRNA sequences (approximate binding site is indicated at the right). **D)** Comparison of 27Stotal pre-rRNA (detected by EC2 probe) to 27SA2 pre-rRNA (detected by A2A3 probe) signals in RNA samples isolated from pull-downs (TAP-tagged bait proteins as indicated). Exposure was adjusted to roughly have the same intensities for the 35S / 32S pre-rRNA.


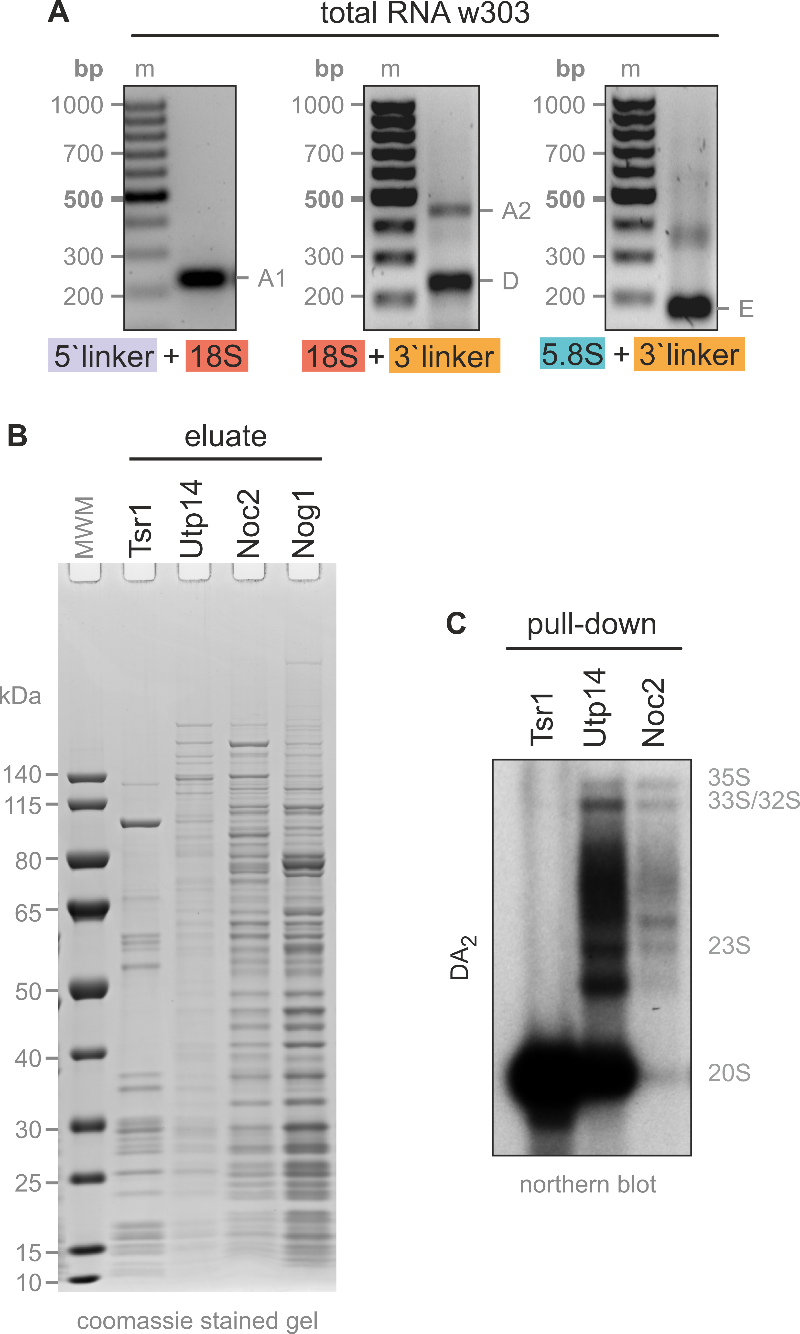


**Supplemental Figure S4:** Riboprobing allowed detection of different pre-rRNA species using a 5` or 3` linker in combination with different primers. **A)** Products of the Riboprobing reaction separated in an 1.5% agarose gel. Total RNA was investigated with Riboprobing using different linker and primer combinations (see also Figure 3G). m: 100 bp ladder (Thermo Fischer) **B)** Commassie stained protein gel with TEV-eluates of the indicated bait proteins. MWM: PageRuler™ pre-stained protein ladder (Thermo Fisher) **C)** Investigation of pre-rRNAs isolated from different pull-downs by northern blot with the DA2 probe.


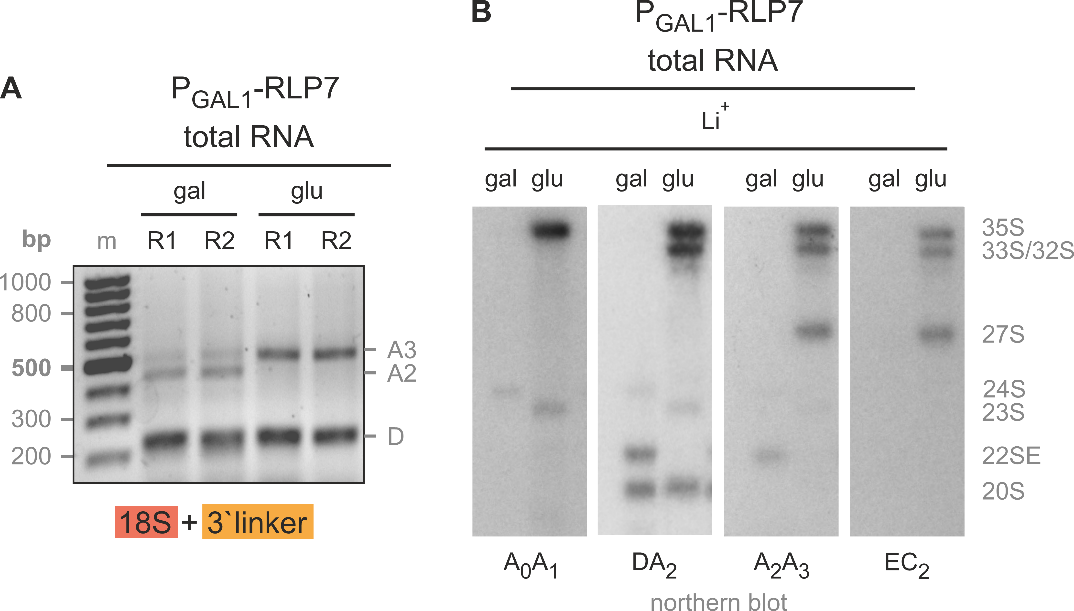


**Supplemental Figure S5:** Total RNA isolated from the P*GAL1*-Rlp7 strain under wildtype conditions (gal) and 16 hours of Rlp7 depletion (glu). **A)** Products of the Riboprobing reaction separated in an 1.5% agarose gel. Using the 3` linker in combination with the 18S primer showed a shift from mainly 20S pre-rRNA to aberrant 23S pre-rRNA when Rlp7 was depleted. Two independent biological replicates are shown (R1, R2). m: 100 bp ladder (Thermo Fischer) **B)** Additional treatment with lithium chloride (Li+) for 3 hours was performed on wildtype and depletion conditions. Northern blot with different probes (indicated on the bottom) and detected pre-rRNA species given on the right.


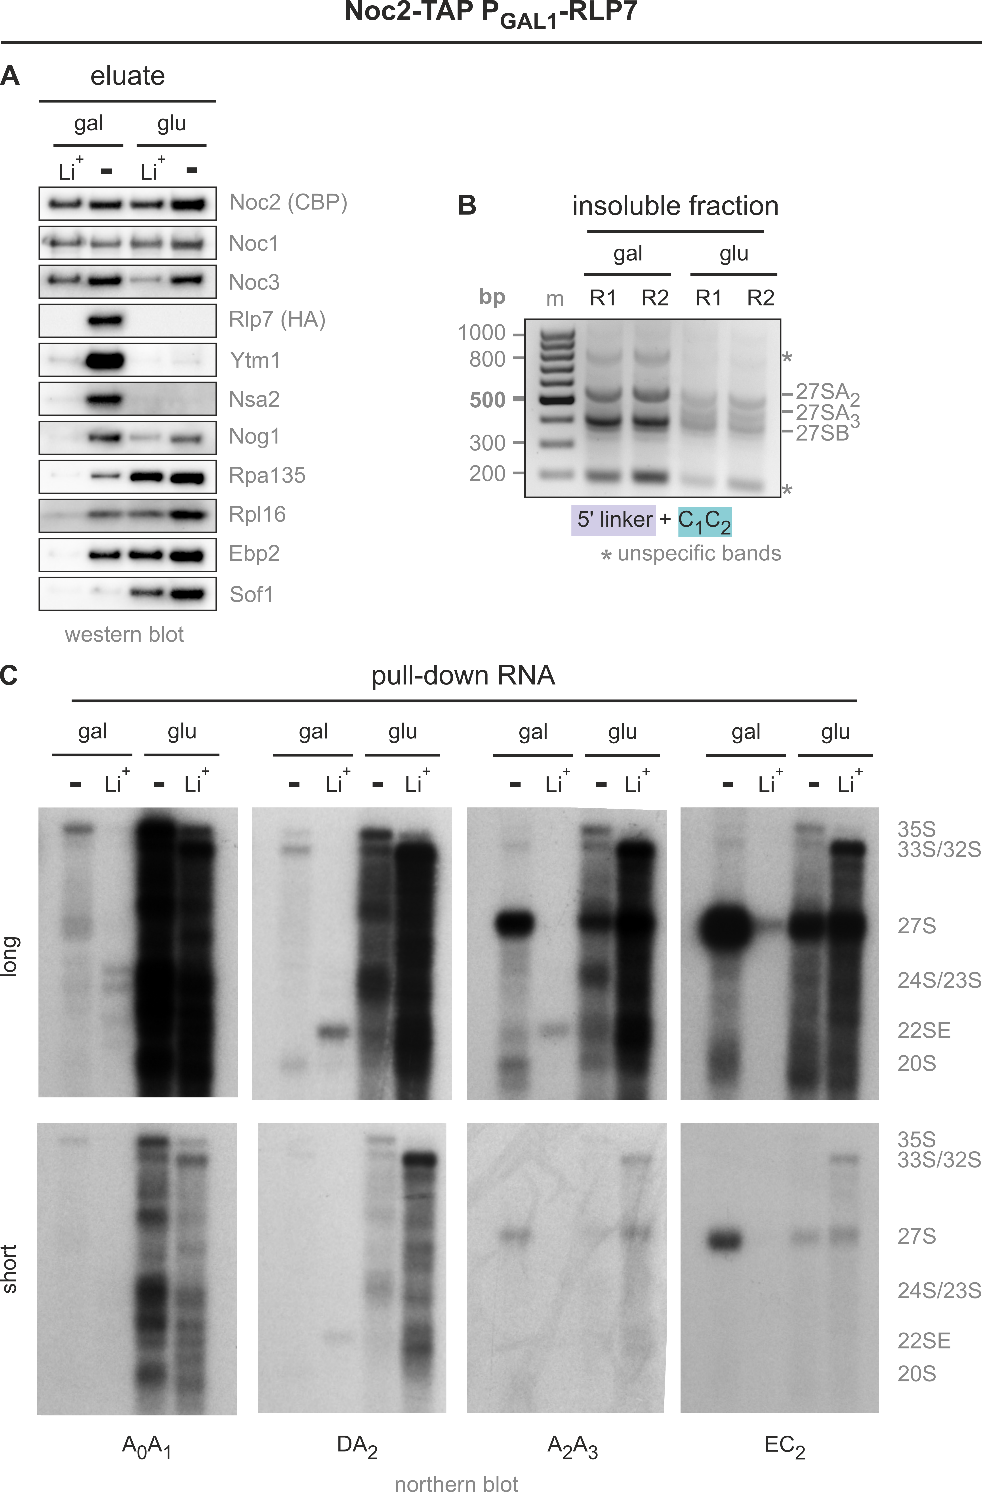


**Supplemental Figure S6:** TAP-purification of theNoc2-TAP P*GAL1*-Rlp7 strain, wildtype conditions (gal) and 16 hours of Rlp7 depletion (glu). Indicated samples were additionally treated with lithium chloride for 3 hours (Li+). (-) untreated samples. **A)** TEV-eluates analyzed by western blot (antibodies given at the right side). **B)** Products of the Riboprobing reaction separated in an 1.5% agarose gel. Riboprobing of RNA isolated from the insoluble fraction of the cell lysate was performed with the 5` linker and C1C2 primer. Two independent biological replicates are shown (R1, R2). m: 100 bp ladder (Thermo Fischer). **C)** Northern blot with two exposures (long/short) for each probe (as indicated on the bottom) and detected pre-rRNA species given on the right.


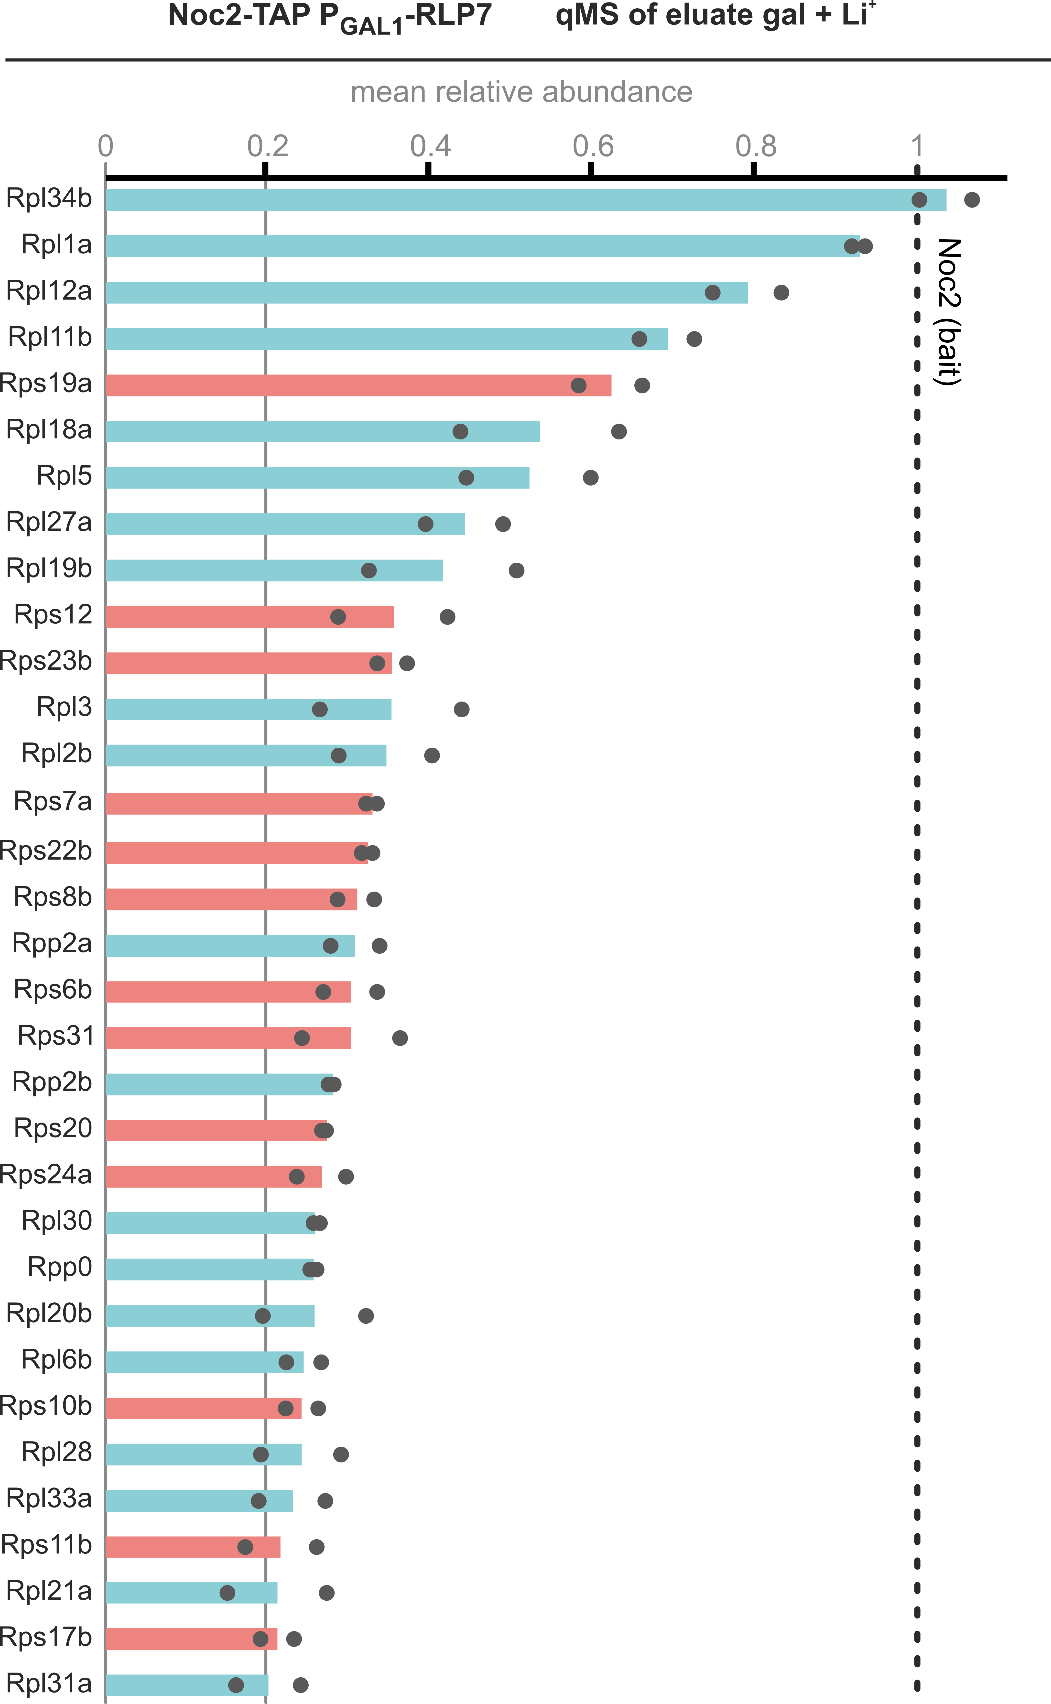


**Supplemental Figure S7:** Highest co-enriched ribosomal proteins relative to the bait protein (Noc2-TAP) in the LiCl treated wildtype sample as identified by qMS and TOP3 stoichiometry calculations of 121 assigned ribosomal assembly factors or ribosomal proteins (large or small subunit) (see supplemental excel sheet S1). Ribosomal proteins with a standard deviation of < 0.1 and a mean relative abundance of > 0.2 to the bait Noc2 are shown (dots represent individual replicates).

**
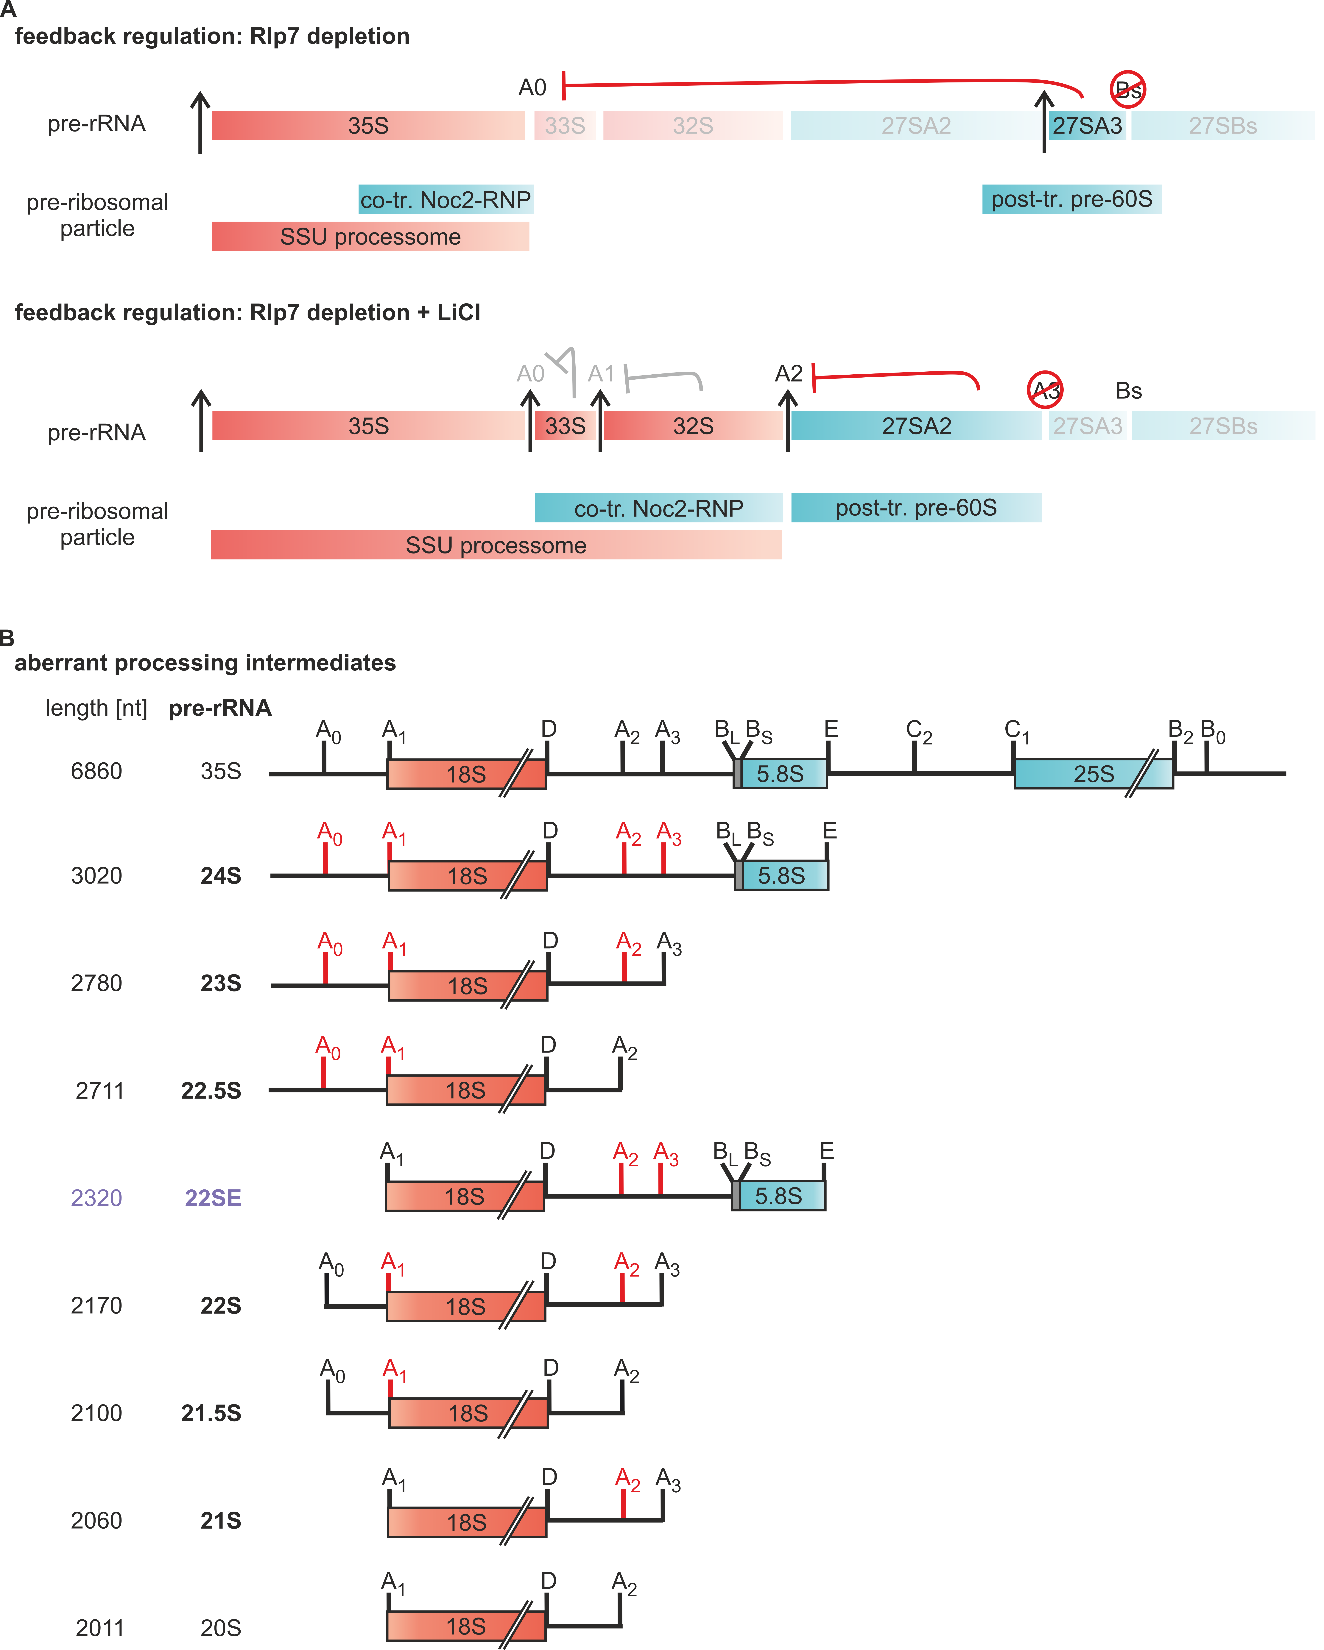
**

**Supplemental Figure S8: A)** Proposed feedback model: 27SA3 pre-rRNA accumulation directly leads to a downregulation of A0 cleavage leading to accumulation of 35S pre-rRNA. On the other hand, accumulation of 27SA2 pre-rRNA does not downregulate clavage in A0, but in A2 directly, leading to stepwise accumulation of upstream pre-rRNAs. **B)** Overview of aberrant processing intermediates (except non-aberrant 35S and 20S pre-rRNA), including the here described 22SE (purple). All of those aberrant pre-rRNAs result from inhibition of one or more of the A0 to A3 processing sites.

**Supplemental sequences**

**Sequence 1**

unspecific 800 nt band (5` linker and C1C2 primer)

5`-CCCTCCTTGACAGTCTTGACACTGTGGAGTTTTCATATCTTTGCAACTTTTTCTT
TGGGCATTCGAGCAATCGGGGCCCAGAGGTAACAAACACAAACAATTTTATCTATTCATTAAATTTTTGTCAAAAACAAGAATTTTCGTAACTGGAAATTTTAACATATTAAAAACTTTCAACAACGGATCTCTTGGTTCTCGCATCGATGAAGAACGCAGCGAAATGCGATACGTAATGTGAATTGCAGAATTCCGTGAATCATCGAATCTTTGAACGCACATTGCGCCCCTTGGTATTACCAGGGGGCATGCCTGTTTGAGCGTCATTTCCTTCTCAAACATTCTGTTTGGTAGTGAGTGATACTCTTTGGAGTTAAC -3`

5` linker, ITS1, 5.8S rRNA, ITS2

sequencing reaction with C1C2 primer

*(note: Even though unspecific binding to the 25S rRNA leads to this band at 800 nt, sequencing with C1C2 primer starts at the correct position. The whole fragment was confirmed with additional sequencing primers.)*

**Sequence 2**

unspecific 380 nt band (5` linker and C1C2 primer)

5`-CTCCCTCCTTGACAGTCTTGTTGACCTCAAATCAGGTAGGAGTACCCGCTGAAC
TTAAGCATATCAATAAGCGGAGGAAAAGAAACCAACCGGGATTGCCTTAGTAACGGCGAGTGAAGCGGCAAAAGCTCAAATTTGAAATCTGGTACCTTCGGTGCCCGAGTTGTAATTTGGAGAGGGCAACTTTGGGGCCGTTCCTTGTCTATGTTCCCTGGAACAGGACGTCATAGAGGGTGAGAATATGAGTGTGGCGAGGAGTGCGGTTTTTTTAAAAGTACCTGCGGAGAGCCGAGAATCATGGGATTGCAGATCTCACAGGGCGGTACCTCCATCACAGGTACATGGCCT-3`

5` linker, 25S rRNA

sequencing reaction with C1C2 primer

**Sequence 3**

unspecific 200 nt band (5` linker and C1C2 primer)

5`-CCTCTCCCTCCTTGACAGTCTTGAAACTTTCAACAACGGATCTCTTGGTTCTCG
CATCGATGAAGAACGCAGCGAAATGCGATACGTAATGTGAATTGCAGAATTCCGTGAATCATCGAATCTTTGAACGCACATTGCGCCCCTGGTATCCAGGGGCTGCC-3`

5` linker, 5.8S rRNA

sequencing reaction with C1C2 primer

**Sequence 4**

310 nt band (5` linker and 18S primer): site A0

5`-CCCTCCTTGCCAGTCTTGCTTTTAGCAAGAGGGAATRGGKGGGAAAAAAAAA
AAGAGATTTCGGTTTCTTTCTTTTTTACTGCTTGTTGCYCCTCCTTTTMAGWTAGKTATCTGGTTGATCCTGCCAGTAGTCATATGCTTGTCTCAAAGATTAAGCCATGCATGTCTAAGTATAAGCAATTTATACAGTGAAACTGCGAATGGCTCATTAAATCAGTTATCGTTTATTTGATAGTTCCTTTACTACATGGTATAACTGT-3`

5` linker, 5`ETS, 18S rRNA

sequencing reaction with 18S primer

**Sequence 5**

220 nt band (5` linker and 18S primer): site A1

5`-CCCTCCTTGACAGTCTTGTATCTGGTTGATCCTGCCAGTAGTCATATGCTTGTC
TCAAAGATTAAGCCATGCATGTCTAAGTATAAGCAATCCCTCCTTGACAGTCTTGTATCTGGTTGTCCTGCCATTTTGCC-3`

5` linker, 18S rRNA

sequencing reaction with 18S primer

**Sequence 6**

400 nt band (18S primer and 3` linker): site A2

5`-ANCACCGCCCGTCGCTAGTACCGATTGAATGGCTTAGTGAGGCCTCAGGATC
TGCTTAGAGAAGGGGGCAACTCCATCTCAGAGCGGAGAATTTGGACAAACTTGGTCATTTAGAGGAACTAAAAGTCGTAACAAGGTTTCCGTAGGTGAACCTGCGGAA
GGATCATTAAAGAAATTTAATAATTTNGAAAATGGATTTTTTTGTTTTGGCAAGAGCATGAGAGCTTTTACTGGGCAAGAAGACAAGAGATGGAGAGTCCAGCCGGGCCTGCGCTTAAGTGCGCGGTCTTGCTAGGCTTGTAAGTTTCTTTCTTGCTATTCCAAACGGTGAGAGATTTCTGTGCTTTTGTTATAGGACAATTAAAACCGTTTCAATACAACGTACCCTCTTCTCACGTG-3`

18S rRNA, ITS1, 3` linker

sequencing reaction with 18S primer

**Sequence 7**

500 nt band (18S primer and 3` linker): site A3

5`-GGGGTTTCCTGCCTTTGTACACCGCCCGTCGCTAGTACCGATTGAATGGCTTAG
TGAGGCCTCAGGATCTGCTTAGAGAAGGGGGCAACTCCATCTCAGAGCGGAGAATTTGGACAAACTTGGTCATTTAGAGGAACTAAAAGTCGTAACAAGGTTTCCGTAGGTGAACCTGCGGAAGGATCATTAAAGAAATTTAATAATTTTGAAAATGGATTTTTTTGTTTTGGCAAGAGCATGAGAGCTTTTACTGGGCAAGAAGACAAGAGATGGAGAGTCCAGCCGGGCCTGCGCTTAAGTGCGCGGTCTTGCTAGGCTTGTAAGTTTCTTTCTTGCTATTCCAAACGGTGAGAGATTTCTGTGCTTTTGTTATAGGACAATTAAAACCGTTTCAATACAACACACTGTGGAGTTTTCATATCTTTGCAACTTTTTCTTTGGGCATTCGAGCAATCGGGGCCCAGAGGTAACGTACCCTCTTCTCACGTG-3`

18S rRNA, ITS1, 3` linker

sequencing reaction with 18S primer

**Sequence 8**

250 nt band (18S primer and 3` linker): site D

5`-GGGGTTGTCCTGGCCTTTGTACACACCGCCCGTCGCTAGTACCGATTGAATGGC
TTAGTGAGGCCTCAGGATCTGCTTAGAGAAGGGGGCAACTCCATCTCAGAGCGGAGAATTTGGACAAACTTGGTCATTTAGAGGAACTAAAAGTCGTAACAAGGTTTCCGTAGGTGAACCTGCGGAAGGATCATTAGTACCCTCTTCTCACGTAGA-3`

18S rRNA, 3` linker

sequencing reaction with 18S primer

**Sequence 9**

300 nt band (5.8S primer and 3` linker): site C2

5`-CGATGCGATACGTAATGTGAATTGCAGAATTCCGTGAATCATCGAATCTTTGA
ACGCACATTGCGCCCCTTGGTATTCCAGGGGGCATGCCTGTTTGAGCGTCATTTCCTTCTCAAACATTCTGTTTGGTAGTGAGTGATACTCTTTGGAGTTAACTTGAAATTGCTGGCCTTTTCATTGGATGTTTTTTTTCCAAAGAGAGGTTTCTCTGCGTGCTTGAGGTATAATGCAAGTACGGTCGTTTTGTACCCTCTTCTCAAGTGA-3`

5.8S rRNA, ITS2, 3` linker

sequencing reaction with 5.8S primer

**Sequence 10**

150 nt band (5.8S primer and 3` linker): site E

5`-GTGAATTGCAGAATTCCGTGAATCATCGAATCTTTGAACGCACATTGCGC
CCCTTGGTATTCCAGGGGGCATGCCTGTTTGAGCGTCATTTGTACCCTCTTC
TCACGTG-3`

5.8S rRNA, 3` linker

sequencing reaction with 5.8S primer

**Sequence 11**

540 nt band (5` linker and C1C2 primer): site A2

5`-CTCCCTCCTTGACAGTCTTGACACTGTGGAGTTTTCATATCTTTGCAACTTTTTC
TTTGGGCATTSGAGCAATCGGGGCCCAGAGGTAACAAACACAAACAATTTTATCTATTCATTAAATTTTTGTCAAAAACAAGAATTTTCGTAACTGGAAATTTTAAAATATTAAAAACTTTCAACAACGGATCTCTTGGTTCTCGCATCGATGAAGAACGCAGCGAAATGCGATACGTAATGTGAATTGCAGAATTCCGTGAATCATCGAATCTTTGAACGCACATTGCGCCCCTTGGTATTCCAGGGGGCATGCCTGTTTGAGCGTCATTTCCTTCTCAAACATTCTGTTTGGTAGTGAGTGATACTCTTTGGAGTTAACTTGAAATTGCTGGCCTTTTCATTGGATGTTTTTTTTCCAAAGAGAGGTTTCTCTGCGTGCTTGAGGTATAATGCAAGTACGGTCGTTTTAGGTTTTACCAACTGCGGCTAATCTTTTTTTATACTGAGCGTATNG-3`

5` linker, ITS1, 5.8S rRNA, ITS2

sequencing reaction with C1C2 primer

**Sequence 12**

460 nt band (5` linker and C1C2 primer): site A3

5`-TCCCTCCTTGACAGTCTTGACACAAACAATTTTATCTATTCATTAAATTTTTGTC
AAAAACAAGAATTTTCGTAACTGGAAANTTTAAAATATTAAAAACTTTCAACAACGGATCTCTTGGTTCTCGCATCGATGAAGAACGCAGCGAAATGCGATACGTAATGTGAATTGCAGAATTCCGTGAATCATCGAATCTTTGAACGCACATTGCGCCCCTTGGTATTCCAGGGGGCATGCCTGTTTGAGCGTCATTTCCTTCTCAAACATTCTGTTTGGTAGTGAGTGATACTCTTTGGAGTTAACTTGAAATTGCTGGCCTTTTCATTGGATGTTTTTTTTCCAAAGAGAGGTTTCTCNGCGTGCTTGAGGTATAATGCAAGTACGGTCGTTTTNGGTTTTACCAANTGCGGC-3`

5` linker, ITS1, 5.8S rRNA, ITS2

sequencing reaction with C1C2 primer

**Sequence 13**

400 nt band (5` linker and C1C2 primer): site BL and BS

5`-TTGCCTTTCCTCCCTCCTTGACAGTCTTGAAACTTTCAACAACGGATCTCTTGG
TTCTCGCATCGATGAAGAACGCAGCGAAATGCGATACGTAATGTGAATTGCAGAATTCCGTGAATCATCGAATCTTTGAACGCACATTGCGCCCCTTGGTATTCCAGGGGGCATGCCTGTTTGAGCGTCATTTCCTTCTCAAACATTCTGTTTGGTAGTGAGTGATACTCTTTGGAGTTAACTTGAAATTGCTGGCCTTTTCATTGGATGTTTTTTTTCCAAAGAGAGGTTTCTCTGCGTGCTTGAGGTATAATGCAAGTACGGTCGTTTTAGGTTTTACCAACTGCGGCTAATCTTTTCTTATAGTGAGCGTATGGAACAGTATCGCTTGGAAAT-3`

5` linker, 5.8S rRNA, ITS2

sequencing reaction with C1C2 primer

**References (Supplemental Information)**

Janke, Carsten; Magiera, Maria M.; Rathfelder, Nicole; Taxis, Christof; Reber, Simone; Maekawa, Hiromi et al. (2004): A versatile toolbox for PCR-based tagging of yeast genes: new fluorescent proteins, more markers and promoter substitution cassettes. In: *Yeast (Chichester, England)* 21 (11), S. 947–962. DOI: 10.1002/yea.1142.

Ohmayer, Uli; Gamalinda, Michael; Sauert, Martina; Ossowski, Julius; Pöll, Gisela; Linnemann, Jan et al. (2013): Studies on the assembly characteristics of large subunit ribosomal proteins in S. cerevisae. In: *PLoS ONE* 8 (7), e68412. DOI: 10.1371/journal.pone.0068412.

Sahasranaman, Aarti; Dembowski, Jill; Strahler, John; Andrews, Philip; Maddock, Janine; Woolford, John L. (2011): Assembly of Saccharomyces cerevisiae 60S ribosomal subunits: role of factors required for 27S pre-rRNA processing. In: *The EMBO journal* 30 (19), S. 4020–4032. DOI: 10.1038/emboj.2011.338.

Saveanu, Cosmin; Namane, Abdelkader; Gleizes, Pierre-Emmanuel; Lebreton, Alice; Rousselle, Jean-Claude; Noaillac-Depeyre, Jacqueline et al. (2003): Sequential Protein Association with Nascent 60S Ribosomal Particles. In: *Molecular and cellular biology* 23 (13), S. 4449–4460. DOI: 10.1128/MCB.23.13.4449-4460.2003.

Thomas, B. J.; Rothstein, R. (1989): Elevated recombination rates in transcriptionally active DNA. In: *Cell* 56 (4), S. 619–630. DOI: 10.1016/0092-8674(89)90584-9.
